# Supplementary material for: Body mass index variation over time and associated factors among HIV-positive adults on second-line ART in north-west Ethiopia: a retrospective follow-up study
Source: PubMed Central journal article supplement — BMJ Open. 2019 Sep 24;9(9):e033393. doi: 10.1136/bmjopen-2019-033393 (PMC6773344; doi:10.1136/bmjopen-2019-033393), 2019-09-24
Supplement: bmjopen-2019-033393.draft_revisions.pdf [file bmjopen-2019-033393.draft_revisions.pdf]

# BMJ Open

BMJ Open is committed to open peer review. As part of this commitment we make the peer review history of every article we publish publicly available.

When an article is published we post the peer reviewers' comments and the authors' responses online. We also post the versions of the paper that were used during peer review. These are the versions that the peer review comments apply to.

The versions of the paper that follow are the versions that were submitted during the peer review process. They are not the versions of record or the final published versions. They should not be cited or distributed as the published version of this manuscript.

BMJ Open is an open access journal and the full, final, typeset and author-corrected version of record of the manuscript is available on our site with no access controls, subscription charges or pay-per-view fees (<http://bmjopen.bmj.com>).

If you have any questions on BMJ Open's open peer review process please email [info.bmjopen@bmj.com](mailto:info.bmjopen@bmj.com)

# BMJ Open

## Body mass index variation over time and associated factors among HIV positive adults on second line ART in Northwest Ethiopia: A retrospective follow up study

|                               |                                                                                                                                                                                                                                                                                                                                                                                                                                                                                                              |
|-------------------------------|--------------------------------------------------------------------------------------------------------------------------------------------------------------------------------------------------------------------------------------------------------------------------------------------------------------------------------------------------------------------------------------------------------------------------------------------------------------------------------------------------------------|
| Journal:                      | <i>BMJ Open</i>                                                                                                                                                                                                                                                                                                                                                                                                                                                                                              |
| Manuscript ID                 | bmjopen-2019-033393                                                                                                                                                                                                                                                                                                                                                                                                                                                                                          |
| Article Type:                 | Research                                                                                                                                                                                                                                                                                                                                                                                                                                                                                                     |
| Date Submitted by the Author: | 02-Aug-2019                                                                                                                                                                                                                                                                                                                                                                                                                                                                                                  |
| Complete List of Authors:     | Baraki, Adhanom; University of Gondar College of Medicine and Health Sciences, Epidemiology and Biostatistics<br>Gezie, Lemma Derseh; University of Gondar College of Medicine and Health Sciences, Institute of Public Health, Epidemiology and Biostatistics<br>Zelege, Ejigu; University of Gondar College of Medicine and Health Sciences, Epidemiology and Biostatistics<br>Awoke, Tadesse; University of Gondar, Epidemiology & Biostatistics<br>Tsegaye, Adino Tesfahun; Epidemiology & Biostatistics |
| Keywords:                     | Body mass index, Second line ART, Linear mixed effect model                                                                                                                                                                                                                                                                                                                                                                                                                                                  |
|                               |                                                                                                                                                                                                                                                                                                                                                                                                                                                                                                              |

SCHOLARONE™  
Manuscripts

1  
2  
3 1 **Body mass index variation over time and associated factors among**  
4  
5  
6 2 **HIV positive adults on second line ART in Northwest Ethiopia: A**  
7  
8  
9 3 **retrospective follow up study**  
10  
11  
12 4

15 5 Adhanom Gebreegziabher Baraki\*, Lemma Derseh Gezie, Ejigu Gebeye Zeleke, Tadesse Awoke  
16  
17 6 Ayele, Adino Tesfahun Tsegaye  
18  
19  
20  
21 7

23 8 Department of Epidemiology and Biostatistics, Institute of Public Health, College of Medicine  
24  
25 9 and Health Sciences, University of Gondar, Gondar, Ethiopia  
26  
27  
28  
29 10

31  
32 11 Authors Email  
33  
34

35 12 AGB: [adsh04@gmail.com](mailto:adsh04@gmail.com)  
36  
37

38 13 LDG: [lemmagezie@gmail.com](mailto:lemmagezie@gmail.com)  
39  
40

41 14 EGZ: [ejigugebeye@gmail.com](mailto:ejigugebeye@gmail.com)  
42  
43

44 15 TAA: [tawoke7@gmail.com](mailto:tawoke7@gmail.com)  
45  
46

47 16 ATT: [atesfahun1@gmail.com](mailto:atesfahun1@gmail.com)  
48  
49

50 17 \*Corresponding Author  
51  
52

53 18  
54  
55  
56  
57  
58  
59  
60

## 19 Abstract

20 **Objectives:** This study aimed to assess the evolution of Body Mass Index of HIV positive adults  
21 on second line ART over time and factors affecting it in Northwest Ethiopia.

22 **Design:** Institution based retrospective follow up study was conducted using data extracted from  
23 1016 patient cards from February 2008 to February 2016.

24 **Setting:** Eight referral hospitals from Amhara region, Ethiopia were included

25 **Participants:** HIV patients who started second line antiretroviral therapy

26 **Outcome measures:** Change in BMI since starting second line antiretroviral therapy

27 **Results:** Five hundred thirty eight (52.95%) of participants were males and median age of  
28 participants was 33 (P25=28, P75=39). The median follow up time was 18 months (P25=5.2,  
29 P75, 32.2 months). The average change of BMI has showed a linear increase over time. The  
30 amount of BMI increment or decrement according to each variable was shown as  $\beta$  coefficients.  
31 Treatment duration ( $\beta=0.013$ , 95% CI (0.004, 0.022)), Isoniazid prophylaxis ( $\beta=0.87$ , 95% CI  
32 (0.32, 1.42)), Cotrimoxazole prophylaxis ( $\beta=0.63$ , 95% CI (0.08, 1.19)), ambulatory functional  
33 status( $\beta=-1.16$ , 95% CI (-1.95, -1.31)), bedridden functional status( $\beta= -1.83$ , 95% CI (-2.47, -  
34 1.21)), WHO stage III( $\beta=-0.42$ , 95% CI (-0.65, -0.20)) WHO stage IV ( $\beta= -0.62$ , 95% CI (-1.02,  
35 -0.22)), CD4 count ( $\beta=0.001$ , 95% CI (0.0008, 0.0015)); and time interaction of variables like  
36 tertiary educational status( $\beta=0.02$ , 95% CI (0.01, 0.04)), ambulatory functional status( $\beta=0.03$ ,  
37 95% CI (0.01, 0.05)) and WHO stages III ( $\beta=0.01$ , 95% CI (0.007, 0.02)) were found to be  
38 significant predictors.

39 **Conclusion:** BMI of patients has shown a linear increment over the treatment time. Factors  
40 affecting it have been identified but its effect on Cardio-vascular disease needs further study.

41

## Strengths and limitations of this study

- Being a retrospective study, this study shares the limitations of secondary data collection as a result we were unable to find some predictors like viral load, alcohol consumption, smoking and nutritional history.
- The study is not based only on patient cards that started the second line antiretroviral therapy at the same point in time and also the length of follow up period for each participant was not equal across all participants
- The most important strength of this study was the use of longitudinal data analysis. This ensures a valid estimate by handling data that is measured in different time period and has missing values.
- Besides we had a total of 5380 number of BMI measurements taken from 1016 participants with a median BMI of 20.52 Kg/m<sup>2</sup> (P25= 18.2, P75=23). Baseline BMI was calculated for all 1016 patients. These will again strength the precision of the estimates.

## 64 **Background**

65 Human Immunodeficiency Virus (HIV) has continued to be a major global public health  
66 problem, having killed more than 35 million lives so far. In 2017, 940 000 people died from  
67 HIV-related causes globally(1). According to the Ethiopia demographic and health survey of  
68 2016 the adult prevalence of HIV in Ethiopia was 0.9%(2). Death due to HIV/AIDS has  
69 enormously decreased due to the introduction of anti retroviral therapy (ART) and millions of  
70 people are currently accessing it (3).

71 Body weight of HIV patients has been an important diagnostic and evaluation measure. Low  
72 BMI is recognised as one of the first criteria for the clinical definition of Acquired Immune  
73 Deficiency Syndrome (AIDS). The current World Health Organization (WHO) clinical staging  
74 of the disease also includes moderate unexplained weight loss (<10% presumed or measured  
75 body weight, stage 2), unexplained severe weight loss (>10% of body weight or BMI  $\leq$  18.5  
76 kg/m<sup>2</sup>, clinical stage 3) and HIV wasting syndrome (Unexplained severe wasting, clinical stage  
77 4) as criteria to define advanced HIV infection(4).

78 The BMI of HIV patients is an important predictor of ART treatment outcome (5-8), including  
79 the prediction of the CD4 cells change (9) and death (10-12). Negative change in BMI of patients  
80 was also found to be an independent predictor of dropout from HIV care (13).

81 The BMI of HIV patients is affected by gender(14) duration of treatment (10, 15, 16), Isoniazid  
82 Prophylaxis Therapy (IPT) and Cotrimoxazole prophylaxis(CPT) (17, 18) WHO stage (14) and  
83 CD4 count (15, 19).

84 Even though BMI evolution is a very important and easily calculable tool that can predict  
85 treatment outcome, dropout from treatment, CD4 recovery and death literatures about its

1  
2  
3 86 evolution across treatment time and factors affecting it are limited. Therefore this study tried to  
4  
5 87 fill this information gap by determining the BMI evolution over treatment time and identifying  
6  
7  
8 88 the key factors affecting it. Information generated by this study will contribute to monitor the  
9  
10 89 response of patients for antiretroviral therapy.

## 11 12 90 **Method and materials**

### 13 14 15 91 **Study design and period**

16  
17 92 An institution based retrospective follow up study was conducted among adults, age 24 and  
18  
19  
20 93 above who are started on second line ART from February 2008 to February 2016

### 21 22 94 **Study area and population**

23  
24 95 The study was conducted in Amhara regional state which is one of the nine administrative  
25  
26  
27 96 regions and two city councils of Ethiopia. The region constitutes majority of ART users in the  
28  
29 97 country. The study population was adult HIV infected patients on second line ART in all the nine  
30  
31 98 referral hospitals of the region. The first-line treatment consists of a combination of two  
32  
33  
34 99 nucleoside/nucleotide reverse transcriptase inhibitors (NRTI) with one non-nucleoside reverse  
35  
36 100 transcriptase inhibitor (NNRTI). Should failure of first-line treatment occur, a second-line  
37  
38 101 treatment is implemented, using two NRTIs not previously used in first-line treatment, as well as  
39  
40  
41 102 one additional protease inhibitor (PI).

### 42 43 103 **Sample size and sampling procedure**

44  
45 104 All HIV patients who initiated second line therapy (n=1233) between February 2008 and 2016  
46  
47 105 were included. But only 1016 patients who had two or more measurements of weight were  
48  
49  
50 106 included in the study.

## 107 **Data collection procedures**

108 Data extraction check list was prepared and the data were collected from HIV patient registration  
109 cards. Data about the baseline weight and height of patients and other factors like socio-  
110 demographic, clinical, and treatment related factors were also collected from each HIV patient  
111 registration cards. Adherence to ART was assessed by pill counts at visits and is recorded as  
112 ‘GOOD’ ( $\geq 95\%$  adherence) or FAIR (80%–95%), while POOR adherence is less than 80% (20).

## 113 **Data structure, compilation and analysis strategy**

114 The data was cleansed and entered in to EPI info version 7 and analyzed using STATA version  
115 14.0. Body Mass Index (BMI) of HIV patients was computed by dividing the weight of patients  
116 in kilogram (kg) that was recorded during each follow up visit, to their baseline height in meter  
117 squared. Exploratory data analysis for the weight of patients including individual profile plot,  
118 mean profile plot, descriptive and summary statistics were done. To determine the factors  
119 associated with BMI of patients univariate analysis for each independent variable was assessed  
120 and those found to be significant ( $p\text{-value} < 0.25$ ) were selected for the multivariate analysis. The  
121 need for random intercept and random slope was checked by likelihood ratio test. Finally a  
122 model that can handle repeated measurements that have between individual variation and within  
123 individual variation, that is linear mixed effect model with random intercept and random slop  
124 was fitted.

## 125 **Patient and Public Involvement**

126 Since we have used secondary data/chart review, patients or the public were not involved during  
127 identifying the research question or design and conduct of the study.

128



## 129 **Results**

### 130 **Patient characteristics**

131 We had a total of 1016 adult patients who were taking second line ART. Among the total 538  
132 (52.95%) were males. All participants were above or equal to the age of 24 with median age of  
133 33 year (P25=28, P75=39). Large proportion of these patients 370 (37.1%) were unemployed  
134 and 371 (36.9%) have attended secondary school.

135 The median follow up time was 18 months (P25=5.2, P75, 32.2). There were a maximum of 12  
136 and a minimum of 2 measurements of weight per patient. Almost all visits were not balanced in  
137 their time of measurements. The median time between each weight measurement was  
138 6.7(P25=4.27, P75=10.03), 6.08(P25=4.14, P75=9), 6.13(P25=4.2, P75=8.9), 6.27(P25=4.53,  
139 P75=8.9), 5.9(P25=3.97, P75=7.79), 5.83(P25=3.7, P75=8.13), 5.45 (P25=3.37, P75=7.43),  
140 4.86(P25=2.97, P75=6.2), 5.19(P25=3, P75=7.37), 5.97(P25=4.23, P75=7.04), 5.55(P25=2.83,  
141 P75=5.86) and 3(P25=0.9, P75=4.84) months from first to twelfth weight measurement  
142 respectively.

143 At the initiation of second line ART majority of participants, 393 (45.54%), were at WHO stage  
144 I and 324 (37.54%) were at WHO stage III. Large proportion of participants 871 (86%) had  
145 working functional status at base line, the rest 114 (11.25%) and 28 (2.75%) were ambulatory  
146 and bed ridden respectively. The median CD4 count was 253 (P25=147, P75=399). Isoniazid  
147 Prophylaxies Therapy and CPT were given for 247 (24.87%) and 256 (25.65%) of participants  
148 respectively (**Table 1**).

### 149 **Exploratory data analysis**

150 At baseline a total of 391(38.5%) had BMI of less than 18.5kg/m<sup>2</sup> whereas 549(54%), 64(6.3%)  
151 and 12(1.2%) had BMI 18.5-24.9 kg/m<sup>2</sup>, 25-29.9 kg/m<sup>2</sup> and  $\geq$ 30kg/m<sup>2</sup> respectively.

## 152 **Individual Profile**

153 The average BMI of patients at baseline was 19.03Kg/m<sup>2</sup> (SD=3.6 Kg/m<sup>2</sup>). The minimum and  
154 maximum BMI was 8.33 Kg/m<sup>2</sup> and 33.59 Kg/m<sup>2</sup> respectively. Before proceeding to the formal  
155 statistical analysis we have described the data by exploring how individuals change in BMI over  
156 time. To make the individual profile plot more informative and understandable, we have  
157 prepared it for the first 100 individuals (**Figure 1**).

158 As we can see from this plot, the BMI status of patients has high variability within an individual  
159 over time and among individuals at baseline and also through time. Therefore to fit the data  
160 which has variability in the intercept and slope of trajectories very well, we have used a mixed  
161 model.

## 162 **Exploring the mean profile**

163 As stated above all measurements in the data have no similar time of measurements therefore we  
164 have used smoothing to determine BMI evolution over time (**Figure-2**).

165 As one can easily understand from the mean profile plot the BMI of these patients showed a  
166 linear increment over the treatment time.

## 167 **Modeling the BMI**

### 168 **Correlation structure checking and model comparison**

169 Comparing with AIC, the correlation structure with lowest AIC was chosen, in this case the  
170 unstructured correlation structure (**Table-2**).

171 The need for random slop and intercept was checked by likelihood ratio test of model without a  
172 random intercept, with only random intercept and a model with both random intercept and slop  
173 (**Table-3**).

1  
2  
3 174 So as we can see from the table-3 the inclusion of random intercept and random slop is  
4  
5 175 reasonable so in the final model we have used both random intercept and random slop.  
6  
7

### 8 9 176 **Factors affecting the BMI evolution over time**

10  
11 177 Based on the multi-variable output: time since the start of second line ART, IPT , CPT,  
12  
13 178 Functional status, WHO stage of the disease; and time interaction of categorical variables like  
14  
15 179 educational status, functional status and WHO stages were found to be significant predictors of  
16  
17 180 the BMI evolution of HIV patients on second line ART.

18  
19 181 Keeping all the other variables constant, for a one month increment in the treatment duration the  
20  
21 182 BMI of patients' increases by 0.013 kg/m<sup>2</sup>. But specifically individuals who have tertiary level of  
22  
23 183 education, ambulatory functional status and who are at WHO stage III have additional 0.02  
24  
25 184 kg/m<sup>2</sup>, 0.03 kg/m<sup>2</sup> and 0.01 kg/m<sup>2</sup> increment respectively in their BMI for a one month  
26  
27 185 increment in the duration of treatment.  
28  
29

30  
31 186 Taking IPT and CPT increases BMI by 0.87 kg/m<sup>2</sup> and 0.63 kg/m<sup>2</sup> respectively as compared to  
32  
33 187 their counter parts. Nongovernmental organizations employment was associated with a 2.02  
34  
35 188 kg/m<sup>2</sup> increment when compared to government employment. Patients who are ambulatory and  
36  
37 189 bedridden in their functional status have a 1.16 kg/m<sup>2</sup> and 1.83 kg/m<sup>2</sup> decrement in their BMI as  
38  
39 190 compared to those who have working functional status. Patients who are at WHO stage III and  
40  
41 191 WHO stage IV have decreased BMI by 0.42 kg/m<sup>2</sup> and 0.62 kg/m<sup>2</sup> when compared with those  
42  
43 192 who are at WHO stage I. For a unit cell/mm<sup>3</sup> increase in the CD4 count of patients BMI was  
44  
45 193 found to increase by a factor of 0.001 kg/m<sup>2</sup> (**Table-4**).  
46  
47

### 48 49 194 **DISCUSSION**

50  
51  
52  
53 195 This study has found a linear increment in BMI of patients over treatment time. There were BMI  
54  
55 196 differences between subjects at baseline and in their progress over time.  
56  
57

1  
2  
3 197 Factors found to have a significant effect on the evolution of BMI over treatment time at  
4  
5 198 multivariable linear mixed effect model were second line treatment duration, IPT, CPT,  
6  
7 199 employment status, functional status of the patient, WHO stage and CD4 count. Time interaction  
8  
9  
10 200 of educational status, functional status, and WHO stage.

11  
12 201 For a one month increase in treatment duration the BMI of patients increases by 0.04, this  
13  
14 202 finding is in line with studies in South Africa (21), India (10) and United states(22). The possible  
15  
16 203 reasons for weight gain could be due to normal reversion of the weight loss associated with HIV  
17  
18 204 or due to drug related metabolic changes which include hyperlipidemia, insulin resistance and  
19  
20 205 diabetes(23).

21  
22 206 Patients who took IPT and CPT have increased BMI when compared to their counter parts. This  
23  
24 207 finding is supported by other studies like a study conducted in Abidjan (17) and multicenter  
25  
26 208 controlled clinical trial in Africa (18). The main reason for this association could be the reduction  
27  
28 209 of potentially disabling and wasting disease like tuberculosis and other opportunistic infections  
29  
30 210 by these prophylactic drugs(24, 25). A highly increased appetite by the prophylaxis could also be  
31  
32 211 possible explanation(26).

33  
34 212 Being ambulatory and bedridden decreases BMI when compared to those who are working.  
35  
36 213 Since these individuals are not working they may not access nutritious and balanced diet which  
37  
38 214 affects their BMI. Another reason could be additional decreased immunity caused by physical  
39  
40 215 inactivity which makes them more susceptible to minor infections leading to a higher calorie  
41  
42 216 loss(27). These group of people are also at higher risk of diarrheal disease for they cannot take  
43  
44 217 care of themselves which in turn causes weight loss(28).

45  
46 218 When compared with patients who are at WHO stage I, those who are at WHO stage III and  
47  
48 219 WHO stage IV have decreased BMI. This finding is in line with a multicenter study in resource  
49  
50  
51  
52  
53  
54  
55  
56  
57

1  
2  
3 220 limited settings which shows individuals who had high clinical status ( WHO stage III and WHO  
4  
5 221 stage IV) had poorer weight gain when compared to weight change in patients at lower WHO  
6  
7 222 stage(14). The possible reason can be unexplained chronic diarrhea and HIV enteropathy in these  
8  
9 223 patients and the associated malabsorption (4) or it could be due to pyrexia of unknown origin in  
10  
11 224 the late stage of the disease which results an increased calori loss and wasting(29).

12  
13  
14 225 The BMI of patients was also found to increase with the increment in their CD4 count. This  
15  
16 226 positive association is supported by evidence from a study conducted in Boston (15) and  
17  
18 227 Tanzania (19). This increment can be explained by association of increment of CD4 count with  
19  
20 228 good clinical changes like viral suppression, improved immunity and appetite leading to  
21  
22 229 increment in the BMI of patients (13).

23  
24  
25 230 Being a retrospective study, this study shares the limitations of secondary data collection as a  
26  
27 231 result we were unable to find some predictors like viral load, alcohol and smoking marital status  
28  
29 232 and nutritional history.

### 30 31 32 33 34 233 **CONCLUSION**

35  
36 234 In this study we have found a linear increment in the BMI of HIV patients on second line ART.  
37  
38 235 There was a significant variation of BMI of patients at baseline and through ART treatment time.  
39  
40 236 Duration of treatment, IPT, CPT, functional status, WHO stage of the disease, CD4 count; and  
41  
42 237 time interaction of categorical variables like educational status, functional status and WHO  
43  
44 238 stages were found to be significant predictors. The positive change in the BMI of patients shows  
45  
46 239 an encouraging trend for we know this has a positive impact on the CD4 recovery, decrease lost  
47  
48 240 to follow up and death. Clinicians also must consider the identified risk factors when they  
49  
50 241 provide service for these patients.

51  
52  
53  
54  
55 242

## 243 **ABBREVIATIONS**

244 AIC, Akaike's Information Criterion; AIDS, Acquired Immunodeficiency Virus; ART,  
245 Anti-Retroviral Therapy; BIC, Bayesian information criterion; BMI,  
246 Body Mass Index; CI, Confidence Interval; CPT, Co-trimoxazole preventive therapy; HIV,  
247 Human Immuno Deficiency Virus; IPT, Isoniazid Prophylaxis Therapy; Kg,  
248 Kilogram; NGO, Non Governmental Organizations; WHO,  
249 World Health Organization.

## 250 **Declarations**

### 251 **Ethical consideration**

252 Ethical clearance was obtained from Institutional Review Board of Institute of Public Health,  
253 University of Gondar. Names and unique ART numbers of patients was not collected to keep the  
254 privacy of patients during the data collection.

### 255 **Availability of data and materials**

256 The data upon which the result based could be accessed by a reasonable request made to the  
257 corresponding author.

### 258 **Funding**

259 Not applicable

### 260 **Consent for publication**

261 Not applicable

### 262 **Competing interest**

263 Authors declare that they have no any conflict of interest

### 264 **Authors' contribution**

1  
2  
3 265 AGB, LDG, EGZ, TAA, ATT have actively participated during Conception and design,  
4  
5 266 acquisition of data, analysis and interpretation of data. All authors have read and approved the  
6  
7  
8 267 final version of the manuscript.  
9

## 10 268 **Acknowledgments**

11  
12 269 First of all we would like to thank the Almighty God. We would like say thank you to University  
13  
14 270 of Gondar, Amhara regional health office and hospitals administrative bodies, clinicians, data  
15  
16  
17 271 clerks and card room workers for their cooperation and permission to conduct the study.  
18  
19

## 20 272 **Authors' information**

21  
22 273 Adhanom Gebreegziabher, has BSc degree in Public health as a background and second degree  
23  
24 274 in Epidemiology and Biostatistics; now teaching Epidemiology, Research methodology and  
25  
26  
27 275 communicable disease control courses in the University of Gondar, Ethiopia  
28  
29

30 276

31  
32  
33 277

34  
35  
36 278

37  
38 279

39  
40  
41 280

42  
43  
44 281

45  
46 282

47  
48  
49 283

50  
51 284

52  
53  
54 285

286 **REFERENCES**

- 287 1. World Health Organization. HIV/AIDS key facts available at [http://www.who.int/news-room/fact-](http://www.who.int/news-room/fact-sheets/detail/hiv-aids)  
288 [sheets/detail/hiv-aids](http://www.who.int/news-room/fact-sheets/detail/hiv-aids). 2018.
- 289 2. Central statistical agency. Ethiopia Demographic and Health Survey HIV Prevalence Report  
290 available at <https://www.dhsprogram.com/pubs/pdf/FR328/FR328HIV.pdf>. 2016.
- 291 3. Mahy M, Stover J, Stanecki K, Stoneburner R, Tassie J-M. Estimating the impact of antiretroviral  
292 therapy: regional and global estimates of life-years gained among adults. *Sexually transmitted*  
293 *infections*. 2010;86(Suppl 2):ii67-ii71.
- 294 4. World Health Organization. Interim WHO Clinical Staging of HIV/AIDS AND HIV/AIDS Case  
295 Definitions for Surveillance, African Region. available at  
296 <http://www.who.int/hiv/pub/guidelines/clinicalstaging.pdf>. 2005.
- 297 5. Tsegaye AT, Wubshet M, Awoke T, Addis Alene K. Predictors of treatment failure on second-line  
298 antiretroviral therapy among adults in northwest Ethiopia: a multicentre retrospective follow-up study.  
299 *BMJ Open*. 2016;6(12):e012537. Epub 2016/12/10.
- 300 6. Seyoum A, Ndlovu P, Zewotir T. Quasi-Poisson versus negative binomial regression models in  
301 identifying factors affecting initial CD4 cell count change due to antiretroviral therapy administered to  
302 HIV-positive adults in North-West Ethiopia (Amhara region). *AIDS Res Ther*. 2016;13:36. Epub  
303 2016/11/16.
- 304 7. Patel D, Desai M, Shah AN, Dikshit RK. Early outcome of second line antiretroviral therapy in  
305 treatment-experienced human immunodeficiency virus positive patients. *Perspect Clin Res*.  
306 2013;4(4):215-20. Epub 2013/12/07.
- 307 8. Dalhatu I, Onotu D, Odafe S, Abiri O, Debem H, Agolory S, et al. Outcomes of Nigeria's HIV/AIDS  
308 Treatment Program for Patients Initiated on Antiretroviral Treatment between 2004-2012. *PLoS One*.  
309 2016;11(11):e0165528. Epub 2016/11/10.
- 310 9. Koethe JR, Jenkins CA, Lau B, Shepherd BE, Silverberg MJ, Brown TT, et al. Body mass index and  
311 early CD4 T-cell recovery among adults initiating antiretroviral therapy in North America, 1998-2010. *HIV*  
312 *Med*. 2015;16(9):572-7. Epub 2015/05/12.
- 313 10. Chakravarty J, Sundar S, Chourasia A, Singh PN, Kurle S, Tripathy SP, et al. Outcome of patients  
314 on second line antiretroviral therapy under programmatic condition in India. *BMC Infect Dis*.  
315 2015;15:517. Epub 2015/11/18.
- 316 11. Thao VP, Quang VM, Wolbers M, Anh ND, Shikuma C, Farrar J, et al. Second-Line HIV Therapy  
317 Outcomes and Determinants of Mortality at the Largest HIV Referral Center in Southern Vietnam.  
318 *Medicine (Baltimore)*. 2015;94(43):e1715. Epub 2015/10/30.
- 319 12. Swain PK, Grover G. Determination of Predictors Associated With HIV/AIDS Patients on ART  
320 Using Accelerated Failure Time Model for Interval Censored Survival Data. 2016.
- 321 13. Asiimwe SB, Kanyesigye M, Bwana B, Okello S, Muyindike W. Predictors of dropout from care  
322 among HIV-infected patients initiating antiretroviral therapy at a public sector HIV treatment clinic in  
323 sub-Saharan Africa. *BMC Infect Dis*. 2016;16:43. Epub 2016/02/03.
- 324 14. Huisin 't Veld D, Balestre E, Buyze J, Menten J, Jaquet A, Cooper DA, et al. Determinants of  
325 Weight Evolution Among HIV-Positive Patients Initiating Antiretroviral Treatment in Low-Resource  
326 Settings. *J Acquir Immune Defic Syndr*. 2015;70(2):146-54. Epub 2015/09/17.
- 327 15. Mwamburi DM, Wilson IB, Jacobson DL, Spiegelman D, Gorbach SL, Knox TA, et al.  
328 Understanding the Role of HIV Load in Determining Weight Change in the Era of Highly Active  
329 Antiretroviral Therapy. *Clinical Infectious Diseases*. 2005;40(1):167-73.



- 1  
2  
3 330 16. Tang AM, Sheehan HB, Jordan MR, Duong DV, Terrin N, Dong K, et al. Predictors of Weight  
4 331 Change in Male HIV-Positive Injection Drug Users Initiating Antiretroviral Therapy in Hanoi, Vietnam.  
5 332 *AIDS Res Treat*. 2011;2011:890308. Epub 2011/07/22.
- 6 333 17. Guehi C, Badje A, Gabillard D, Ouattara E, Koule SO, Moh R, et al. High prevalence of being  
7 334 Overweight and Obese HIV-infected persons, before and after 24 months on early ART in the ANRS  
8 335 12136 Temprano Trial. *AIDS Res Ther*. 2016;13:12. Epub 2016/03/01.
- 9 336 18. Haller L, Sossouhounto R, Coulibaly IM, Dosso M, Kone M, Adom H, et al. Isoniazid plus  
10 337 sulphadoxine-pyrimethamine can reduce morbidity of HIV-positive patients treated for tuberculosis in  
11 338 Africa: a controlled clinical trial. *Chemotherapy*. 1999;45(6):452-65. Epub 1999/11/24.
- 12 339 19. Li N, Spiegelman D, Drain P, Mwiru RS, Mugusi F, Chalamilla G, et al. Predictors of weight loss  
13 340 after HAART initiation among HIV-infected adults in Tanzania. *AIDS*. 2012;26(5):577-85. Epub  
14 341 2011/12/14.
- 15 342 20. Ministry of Health. Federal Democratic Republic of Ethiopia. National guidelines for  
16 343 comprehensive HIV prevention, care and treatment, . 2014.
- 17 344 21. Huis In 't Veld D, Pengpid S, Colebunders R, Peltzer K. Body Mass Index and Waist Circumference  
18 345 in Patients with HIV in South Africa and Associated Socio-demographic, Health Related and Psychosocial  
19 346 Factors. *AIDS Behav*. 2017. Epub 2017/03/01.
- 20 347 22. Crum-Cianflone N, Roediger MP, Eberly L, Headd M, Marconi V, Ganesan A, et al. Increasing  
21 348 rates of obesity among HIV-infected persons during the HIV epidemic. *Plos one*. 2010;5(4):e10106.
- 22 349 23. Montessori V, Press N, Harris M, Akagi L, Montaner JSG. Adverse effects of antiretroviral therapy  
23 350 for HIV infection. *CMAJ : Canadian Medical Association Journal*. 2004;170(2):229-38.
- 24 351 24. Dowdy DW, Golub JE, Saraceni V, Moulton LH, Cavalcante SC, Cohn S, et al. Impact of isoniazid  
25 352 preventive therapy for HIV-infected adults in Rio de Janeiro, Brazil: an epidemiological model. *Journal of*  
26 353 *acquired immune deficiency syndromes (1999)*. 2014;66(5):552.
- 27 354 25. Mermin J, Lule J, Ekwaru JP, Malamba S, Downing R, Ransom R, et al. Effect of co-trimoxazole  
28 355 prophylaxis on morbidity, mortality, CD4-cell count, and viral load in HIV infection in rural Uganda. *The*  
29 356 *Lancet*. 2004;364(9443):1428-34.
- 30 357 26. Mudie I, Horne N, Crofton J. Isoniazid and weight gain. *British Medical Journal*.  
31 358 1954;1(4874):1304.
- 32 359 27. Nieman DC. Exercise, infection, and immunity. *International journal of sports medicine*.  
33 360 1994;15(3):S131.
- 34 361 28. Katabira ET. Epidemiology and management of diarrheal disease in HIV infected patients.  
35 362 *International journal of infectious diseases*. 1999;3(3):164-7.
- 36 363 29. Hot A, Schmulewitz L, Viard J-P, Lortholary O. Fever of unknown origin in HIV/AIDS patients.  
37 364 *Infectious disease clinics of North America*. 2007;21(4):1013-32.

365

366

367

368

369

370

1  
2  
3  
4 371 **Figures Legend**

5  
6  
7 372 **Figure 1: Individual profile plot of BMI over time for the first 100 individuals at second**  
8  
9 373 **line ART in Amhara region, 2008-2016**

10  
11  
12 374 **Figure 2: Time plot of BMI versus treatment time in months with lowess smoothed curve**  
13  
14  
15 375 **superimposed for HIV patients on second line ART in Amhara region 2008-2016**

16  
17  
18 376

19  
20  
21  
22 377

23  
24  
25  
26 378

27  
28  
29  
30 379

31  
32  
33  
34 380

35  
36  
37  
38 381

39  
40  
41  
42 382

43  
44  
45  
46 383

47  
48  
49  
50 384

51  
52  
53 385  
54  
55  
56  
57  
58  
59  
60

386 **Tables**

387 Table 1 Baseline socio-demographic and baseline characteristics of adults HIV patients on second  
 388 line ART in Amhara region, 2008 to 2016

| Variables           | Number | Percentage |
|---------------------|--------|------------|
| Age                 |        |            |
| 25-34               | 547    | 53.89      |
| 35-44               | 333    | 32.81      |
| 45-54               | 104    | 10.25      |
| 55-64               | 26     | 2.56       |
| ≥ 65                | 6      | 0.59       |
| Sex                 |        |            |
| Female              | 478    | 47.05      |
| Male                | 538    | 52.95      |
| Educational status  |        |            |
| Illiterates         | 315    | 31.34      |
| Primary education   | 201    | 20.00      |
| Secondary education | 371    | 36.92      |
| Tertiary education  | 118    | 11.74      |
| Missing             | 11     | 0.01       |
| Occupation          |        |            |
| Unemployed          | 370    | 36.42      |
| Governmental        | 286    | 28.15      |
| Non-Governmental    | 21     | 2.06       |
| Private             | 66     | 6.50       |
| Daily laborers      | 254    | 25.00      |
| Missing             | 19     | 1.87       |
| WHO stages          |        |            |
| Stage I             | 393    | 45.54      |
| Stage II            | 66     | 7.65       |
| Stage III           | 324    | 37.54      |
| Stage IV            | 80     | 9.27       |
| Functional status   |        |            |
| Working             | 871    | 86         |
| Ambulatory          | 114    | 11.25      |
| Bed ridden          | 28     | 2.75       |
| CPT given           |        |            |
| No                  | 742    | 74.35      |
| Yes                 | 256    | 25.65      |
| INH given           |        |            |
| No                  | 746    | 75.13      |
| Yes                 | 247    | 24.87      |

389 CPT= Cotrimoxazole Prophylaxis Therapy

390 INH= Isoniazide

391 **Table 2: Correlation structure checking and model comparison**

|     | Unstructured | Identity | Exchangeable |
|-----|--------------|----------|--------------|
| AIC | 14337.93     | 17775.34 | 17666.17     |
| BIC | 14531.08     | 17956.02 | 17853.09     |

393 **Table 3: Random Effects Models comparison**

| Random effects         | LR X <sup>2</sup> | P value       |
|------------------------|-------------------|---------------|
| Model1 intercept       | 5625.28           | <b>0.0000</b> |
| Model2 intercept, time | 297.13            | <b>0.0000</b> |

405 **Table 5 Parameter estimates for full linear mixed effect model**

| Characteristics          | Co-efficient | Confidence interval |        | P value |
|--------------------------|--------------|---------------------|--------|---------|
|                          |              | Lower               | Upper  |         |
| Intercept                | 19.03        | 18.11               | 19.95  | 0.000   |
| Sex                      |              |                     |        |         |
| Female                   | 0.00         |                     |        |         |
| Male                     | -0.01        | -0.51               | 0.48   | 0.956   |
| Adherence                |              |                     |        |         |
| Poor                     | 0.00         |                     |        |         |
| Fair                     | 0.43         | -0.24               | 1.10   | 0.207   |
| Good                     | 0.48         | -0.06               | 1.02   | 0.080   |
| INH prophylaxis given    |              |                     |        |         |
| No                       | 0.00         |                     |        |         |
| Yes                      | 0.87         | 0.32                | 1.42   | 0.002   |
| CPT prophylaxis given    |              |                     |        |         |
| No                       | 0.00         |                     |        |         |
| Yes                      | 0.63         | 0.08                | 1.19   | 0.025   |
| Educational status       |              |                     |        |         |
| Illiterate               | 0.00         |                     |        |         |
| Primary                  | -0.03        | -0.72               | 0.66   | 0.924   |
| Secondary                | 0.47         | -0.21               | 1.14   | 0.176   |
| Tertiary                 | 0.94         | -0.01               | 1.89   | 0.051   |
| Functional status        |              |                     |        |         |
| Working                  | 0.00         |                     |        |         |
| Ambulatory               | -1.16        | -1.95               | -1.31  | 0.000   |
| Bedridden                | -1.83        | -2.47               | -1.21  | 0.000   |
| WHO stage                |              |                     |        |         |
| Stage I                  | 0.00         |                     |        |         |
| Stage II                 | -0.06        | -0.45               | 0.33   | 0.760   |
| Stage III                | -0.42        | -0.65               | -0.20  | 0.000   |
| Stage IV                 | -0.62        | -1.02               | -0.22  | 0.002   |
| CD4 count                | 0.001        | 0.0008              | 0.0015 | 0.000   |
| Time on treatment        | 0.013        | 0.004               | 0.022  | 0.005   |
| Education status x time  |              |                     |        |         |
| Illiterate x time        | 0.00         |                     |        |         |
| Primary x time           | 0.002        | -0.01               | 0.015  | 0.801   |
| Secondary x time         | 0.01         | -0.003              | 0.019  | 0.162   |
| Tertiary x time          | 0.02         | 0.01                | 0.04   | 0.009   |
| Functional status x time |              |                     |        |         |
| Working x time           | 0.00         |                     |        |         |
| Ambulatory x time        | 0.03         | 0.01                | 0.05   | 0.000   |
| Bedridden x time         | -0.01        | -0.05               | 0.02   | 0.49    |
| WHO stage x time         |              |                     |        |         |
| Stage I x time           | 0.00         |                     |        |         |
| Stage II x time          | 0.004        | -0.008              | 0.166  | 0.522   |
| Stage III x time         | 0.01         | 0.007               | 0.020  | 0.000   |
| Stage IV x time          | -0.0003      | -0.016              | 0.016  | 0.969   |

406

1  
2  
3 407  
4  
5  
6 408  
7  
8  
9 409  
10  
11  
12 410  
13  
14  
15 411  
16  
17  
18 412  
19  
20  
21 413  
22  
23  
24 414  
25  
26  
27 415  
28  
29  
30 416  
31  
32 417  
33  
34  
35 418  
36  
37  
38 419  
39  
40  
41 420  
42  
43  
44 421  
45  
46  
47 422  
48  
49  
50 423  
51  
52  
53  
54  
55  
56  
57  
58  
59  
60

For peer review only

1  
2  
3  
4  
5  
6  
7  
8  
9  
10  
11  
12  
13  
14  
15  
16  
17  
18  
19  
20  
21  
22  
23  
24  
25  
26  
27  
28  
29  
30  
31  
32  
33  
34  
35  
36  
37  
38  
39  
40  
41  
42  
43  
44  
45  
46  
47  
48  
49  
50  
51  
52  
53  
54  
55  
56  
57  
58  
59  
60

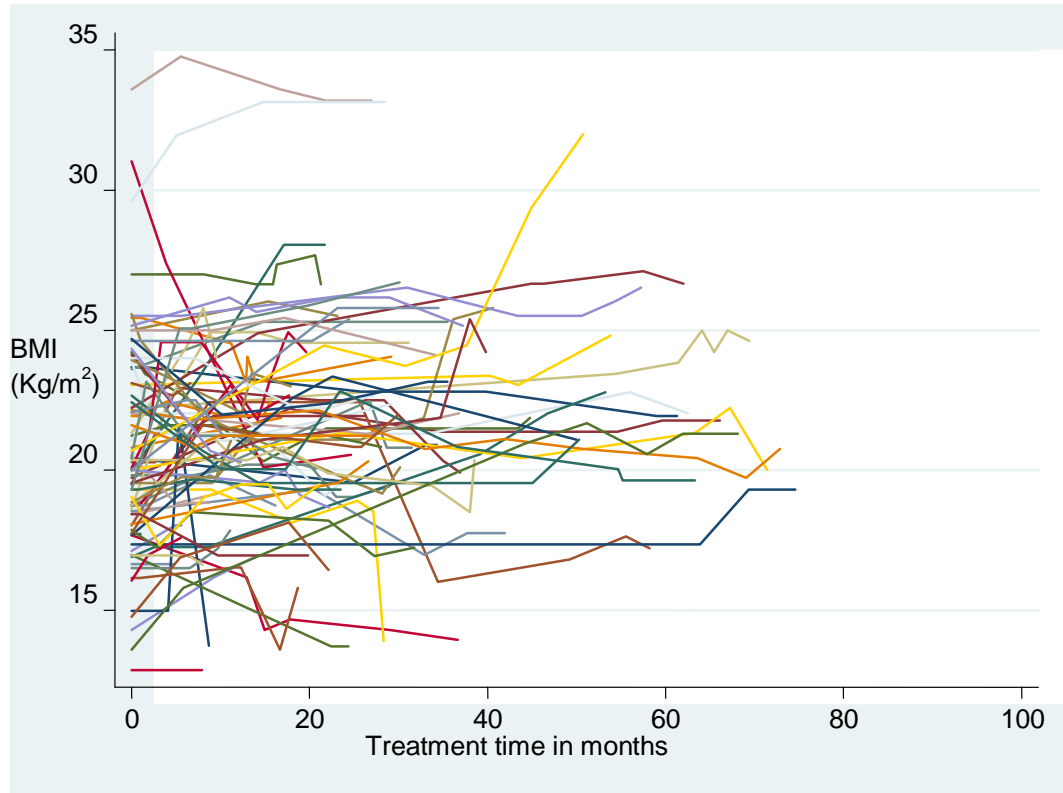

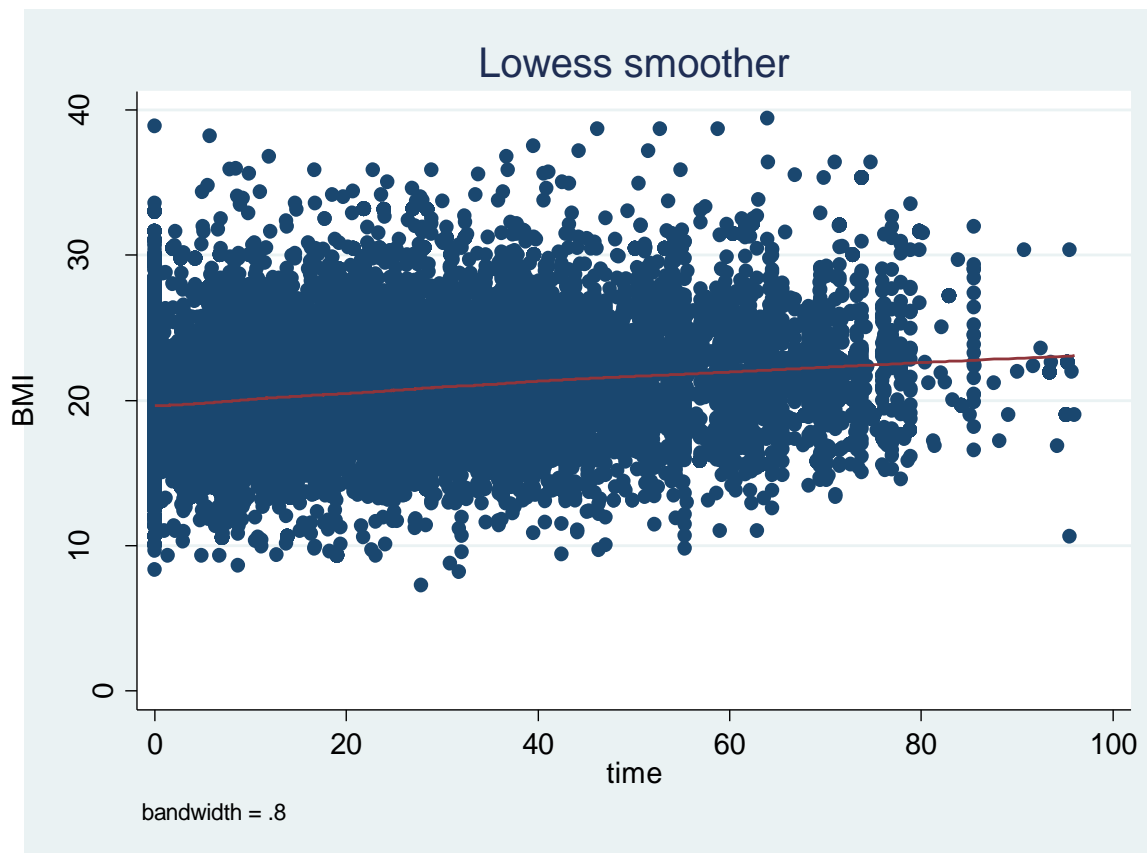

Review only



STROBE Statement—Checklist of items that should be included in reports of *cohort studies*

|                              | Item No | Recommendation                                                                                                                                                                                                                                                                                                         | Page No |
|------------------------------|---------|------------------------------------------------------------------------------------------------------------------------------------------------------------------------------------------------------------------------------------------------------------------------------------------------------------------------|---------|
| <b>Title and abstract</b>    | 1       | (a) Indicate the study's design with a commonly used term in the title or the abstract<br>(b) Provide in the abstract an informative and balanced summary of what was done and what was found                                                                                                                          | 1-2     |
| <b>Introduction</b>          |         |                                                                                                                                                                                                                                                                                                                        |         |
| Background/rationale         | 2       | Explain the scientific background and rationale for the investigation being reported                                                                                                                                                                                                                                   | 4       |
| Objectives                   | 3       | State specific objectives, including any prespecified hypotheses                                                                                                                                                                                                                                                       | 4-5     |
| <b>Methods</b>               |         |                                                                                                                                                                                                                                                                                                                        |         |
| Study design                 | 4       | Present key elements of study design early in the paper                                                                                                                                                                                                                                                                | 5       |
| Setting                      | 5       | Describe the setting, locations, and relevant dates, including periods of recruitment, exposure, follow-up, and data collection                                                                                                                                                                                        | 5       |
| Participants                 | 6       | (a) Give the eligibility criteria, and the sources and methods of selection of participants. Describe methods of follow-up<br>(b) For matched studies, give matching criteria and number of exposed and unexposed                                                                                                      | 5       |
| Variables                    | 7       | Clearly define all outcomes, exposures, predictors, potential confounders, and effect modifiers. Give diagnostic criteria, if applicable                                                                                                                                                                               | 6       |
| Data sources/<br>measurement | 8*      | For each variable of interest, give sources of data and details of methods of assessment (measurement). Describe comparability of assessment methods if there is more than one group                                                                                                                                   | 5-6     |
| Bias                         | 9       | Describe any efforts to address potential sources of bias                                                                                                                                                                                                                                                              | 5       |
| Study size                   | 10      | Explain how the study size was arrived at                                                                                                                                                                                                                                                                              |         |
| Quantitative variables       | 11      | Explain how quantitative variables were handled in the analyses. If applicable, describe which groupings were chosen and why                                                                                                                                                                                           | 5-6     |
| Statistical methods          | 12      | (a) Describe all statistical methods, including those used to control for confounding<br>(b) Describe any methods used to examine subgroups and interactions<br>(c) Explain how missing data were addressed<br>(d) If applicable, explain how loss to follow-up was addressed<br>(e) Describe any sensitivity analyses | 6       |
| <b>Results</b>               |         |                                                                                                                                                                                                                                                                                                                        |         |
| Participants                 | 13*     | (a) Report numbers of individuals at each stage of study—eg numbers potentially eligible, examined for eligibility, confirmed eligible, included in the study, completing follow-up, and analysed<br>(b) Give reasons for non-participation at each stage<br>(c) Consider use of a flow diagram                        | 7       |
| Descriptive data             | 14*     | (a) Give characteristics of study participants (eg demographic, clinical, social) and information on exposures and potential confounders<br>(b) Indicate number of participants with missing data for each variable of interest<br>(c) Summarise follow-up time (eg, average and total amount)                         | 7       |
| Outcome data                 | 15*     | Report numbers of outcome events or summary measures over time                                                                                                                                                                                                                                                         | 7-9     |

|    |                          |    |                                                                                                                                                                                                              |         |
|----|--------------------------|----|--------------------------------------------------------------------------------------------------------------------------------------------------------------------------------------------------------------|---------|
| 1  | Main results             | 16 | (a) Give unadjusted estimates and, if applicable, confounder-adjusted estimates and their precision (eg, 95% confidence interval). Make clear which confounders were adjusted for and why they were included | 7-9     |
| 2  |                          |    | (b) Report category boundaries when continuous variables were categorized                                                                                                                                    |         |
| 3  |                          |    | (c) If relevant, consider translating estimates of relative risk into absolute risk for a meaningful time period                                                                                             |         |
| 4  |                          |    |                                                                                                                                                                                                              |         |
| 5  |                          |    |                                                                                                                                                                                                              |         |
| 6  |                          |    |                                                                                                                                                                                                              |         |
| 7  |                          |    |                                                                                                                                                                                                              |         |
| 8  |                          |    |                                                                                                                                                                                                              |         |
| 9  | Other analyses           | 17 | Report other analyses done—eg analyses of subgroups and interactions, and sensitivity analyses                                                                                                               | --      |
| 10 |                          |    |                                                                                                                                                                                                              |         |
| 11 | <b>Discussion</b>        |    |                                                                                                                                                                                                              |         |
| 12 |                          |    |                                                                                                                                                                                                              |         |
| 13 | Key results              | 18 | Summarise key results with reference to study objectives                                                                                                                                                     | 9-10    |
| 14 | Limitations              | 19 | Discuss limitations of the study, taking into account sources of potential bias or imprecision. Discuss both direction and magnitude of any potential bias                                                   | 11      |
| 15 |                          |    |                                                                                                                                                                                                              |         |
| 16 | Interpretation           | 20 | Give a cautious overall interpretation of results considering objectives, limitations, multiplicity of analyses, results from similar studies, and other relevant evidence                                   | 10 - 11 |
| 17 |                          |    |                                                                                                                                                                                                              |         |
| 18 | Generalisability         | 21 | Discuss the generalisability (external validity) of the study results                                                                                                                                        | 11      |
| 19 |                          |    |                                                                                                                                                                                                              |         |
| 20 | <b>Other information</b> |    |                                                                                                                                                                                                              |         |
| 21 |                          |    |                                                                                                                                                                                                              |         |
| 22 | Funding                  | 22 | Give the source of funding and the role of the funders for the present study and, if applicable, for the original study on which the present article is based                                                | 12      |
| 23 |                          |    |                                                                                                                                                                                                              |         |
| 24 |                          |    |                                                                                                                                                                                                              |         |

\*Give information separately for exposed and unexposed groups.

**Note:** An Explanation and Elaboration article discusses each checklist item and gives methodological background and published examples of transparent reporting. The STROBE checklist is best used in conjunction with this article (freely available on the Web sites of PLoS Medicine at <http://www.plosmedicine.org/>, Annals of Internal Medicine at <http://www.annals.org/>, and Epidemiology at <http://www.epidem.com/>). Information on the STROBE Initiative is available at <http://www.strobe-statement.org>.

# BMJ Open

## Body mass index variation over time and associated factors among HIV positive adults on second-line ART in Northwest Ethiopia: A retrospective follow up study

|                                 |                                                                                                                                                                                                                                                                                                                                                                                                                                                                                                              |
|---------------------------------|--------------------------------------------------------------------------------------------------------------------------------------------------------------------------------------------------------------------------------------------------------------------------------------------------------------------------------------------------------------------------------------------------------------------------------------------------------------------------------------------------------------|
| Journal:                        | <i>BMJ Open</i>                                                                                                                                                                                                                                                                                                                                                                                                                                                                                              |
| Manuscript ID                   | bmjopen-2019-033393.R1                                                                                                                                                                                                                                                                                                                                                                                                                                                                                       |
| Article Type:                   | Original research                                                                                                                                                                                                                                                                                                                                                                                                                                                                                            |
| Date Submitted by the Author:   | 28-Aug-2019                                                                                                                                                                                                                                                                                                                                                                                                                                                                                                  |
| Complete List of Authors:       | Baraki, Adhanom; University of Gondar College of Medicine and Health Sciences, Epidemiology and Biostatistics<br>Gezie, Lemma Derseh; University of Gondar College of Medicine and Health Sciences, Institute of Public Health, Epidemiology and Biostatistics<br>Zelege, Ejigu; University of Gondar College of Medicine and Health Sciences, Epidemiology and Biostatistics<br>Awoke, Tadesse; University of Gondar, Epidemiology & Biostatistics<br>Tsegaye, Adino Tesfahun; Epidemiology & Biostatistics |
| <b>Primary Subject Heading</b>: | Public health                                                                                                                                                                                                                                                                                                                                                                                                                                                                                                |
| Secondary Subject Heading:      | HIV/AIDS                                                                                                                                                                                                                                                                                                                                                                                                                                                                                                     |
| Keywords:                       | Body mass index, Second line ART, Linear mixed effect model                                                                                                                                                                                                                                                                                                                                                                                                                                                  |
|                                 |                                                                                                                                                                                                                                                                                                                                                                                                                                                                                                              |

SCHOLARONE™  
Manuscripts

1  
2  
3  
4 1 **Body mass index variation over time and associated factors among**  
5  
6  
7 2 **HIV positive adults on Second-line ART in Northwest Ethiopia: A**  
8  
9  
10 3 **retrospective follow up study**  
11  
12  
13 4

15 5 Adhanom Gebreegziabher Baraki\*, Lemma Derseh Gezie, Ejigu Gebeye Zeleke, Tadesse Awoke  
16  
17 6 Ayele, Adino Tesfahun Tsegaye  
18  
19  
20  
21 7

23 8 Department of Epidemiology and Biostatistics, Institute of Public Health, College of Medicine  
24  
25 9 and Health Sciences, University of Gondar, Gondar, Ethiopia  
26  
27  
28  
29  
30  
31  
32  
33  
34

35 10  
36  
37  
38  
39  
40  
41  
42  
43  
44 11 Authors Email

45 12 AGB: [adsh04@gmail.com](mailto:adsh04@gmail.com)

46 13 LDG: [lemmagezie@gmail.com](mailto:lemmagezie@gmail.com)

47 14 EGZ: [ejigugebeye@gmail.com](mailto:ejigugebeye@gmail.com)

48 15 TAA: [tawoke7@gmail.com](mailto:tawoke7@gmail.com)

49 16 ATT: [atesfahun1@gmail.com](mailto:atesfahun1@gmail.com)

50 17 \*Corresponding Author  
51  
52  
53 18  
54  
55  
56  
57  
58  
59  
60

## 19 Abstract

20 **Objectives:** This study aimed to assess the evolution of Body Mass Index of HIV positive adults  
21 on second line ART over time and factors affecting it in Northwest Ethiopia.

22 **Design:** Institution based retrospective follow up study was conducted using data extracted from  
23 1016 patient cards from February 2008 to February 2016.

24 **Setting:** Eight referral hospitals from Amhara region, Ethiopia were included

25 **Participants:** HIV patients who started second-line antiretroviral therapy

26 **Outcome measures:** Change in BMI since starting second-line antiretroviral therapy

27 **Results:** Five hundred thirty eight (52.95%) of participants were males and median age of  
28 participants was 33 (IQR: 28; 39). The median follow up time was 18 months (IQR: 5.2; 32.2).

29 The average change of BMI has showed a linear increase over time. The amount of BMI  
30 increment or decrement according to each variable was shown as  $\beta$  coefficients. Treatment  
31 duration ( $\beta=0.013$ , 95% CI (0.004, 0.022)), Isoniazid prophylaxis ( $\beta=0.87$ , 95% CI (0.32, 1.42)),  
32 Cotrimoxazole prophylaxis ( $\beta=0.63$ , 95% CI (0.08, 1.19)), ambulatory functional status ( $\beta= -$   
33 1.16, 95% CI (-1.95, -1.31)), bedridden functional status( $\beta= -1.83$ , 95% CI (-2.47, -1.21)), WHO  
34 stage III ( $\beta=-0.42$ , 95% CI (-0.65, -0.20)) WHO stage IV ( $\beta= -0.62$ , 95% CI (-1.02, -0.22)), CD4  
35 count ( $\beta=0.001$ , 95% CI (0.0008, 0.0015)); and time interaction of variables like tertiary  
36 educational status ( $\beta=0.02$ , 95% CI (0.01, 0.04)), ambulatory functional status ( $\beta=0.03$ , 95% CI  
37 (0.01, 0.05)) and WHO stages III ( $\beta=0.01$ , 95% CI (0.007, 0.02)) were found to be significant  
38 predictors.

39 **Conclusion:** BMI of patients has shown a linear increment over the treatment time. Factors  
40 affecting it have been identified but its effect on Cardio-vascular disease needs further study.

41

1  
2  
3 42  
4  
56 43 **Strengths and limitations of this study**  
7

- 8 44 • Being a retrospective study, this study shares the limitations of secondary data collection,  
9  
10 45 as a result, we were unable to find some predictors like viral load, alcohol consumption,  
11  
12  
13 46 smoking, and nutritional history.  
14  
15 47 • The study is not based only on patient cards that started the second-line antiretroviral  
16  
17 48 therapy at the same point in time and also the length of follow up period for each  
18  
19 49 participant was not equal across all participants  
20  
21  
22 50 • The most important strength of this study was the use of longitudinal data analysis. This  
23  
24 51 ensures a valid estimate by handling data that is measured in different time periods and  
25  
26 52 has missing values.  
27  
28  
29 53 • Besides we had a total of 5380 number of BMI measurements taken from 1016  
30  
31 54 participants with a median BMI of 20.52 Kg/m<sup>2</sup> (IQR: 18.2; 23). Baseline BMI was  
32  
33 55 calculated for all 1016 patients. These will again strength the precision of the estimates.  
34  
35  
36  
37 56  
38  
39  
40 57  
41  
42 58  
43  
44  
45 59  
46  
47  
48 60  
49  
50 61  
51  
52  
53 62  
54  
55  
56 63  
57

## 64 **Background**

65 Human Immunodeficiency Virus (HIV) has continued to be a major global public health  
66 problem, having killed more than 35 million lives so far. In 2017, 940 000 people died from  
67 HIV-related causes globally(1). According to the Ethiopia demographic and health survey of  
68 2016, the adult prevalence of HIV in Ethiopia was 0.9%(2). Death due to HIV/AIDS has  
69 enormously decreased due to the introduction of antiretroviral therapy (ART) and millions of  
70 people are currently accessing it (3).

71 Body weight of HIV patients has been an important diagnostic and evaluation measure. Low  
72 BMI is recognized as one of the first criteria for the clinical definition of Acquired Immune  
73 Deficiency Syndrome (AIDS). The current World Health Organization (WHO) clinical staging  
74 of the disease also includes moderate unexplained weight loss (<10% presumed or measured  
75 body weight, stage 2), unexplained severe weight loss (>10% of body weight or BMI  $\leq$  18.5  
76 kg/m<sup>2</sup>, clinical stage 3) and HIV wasting syndrome (Unexplained severe wasting, clinical stage  
77 4) as criteria to define advanced HIV infection(4).

78 The BMI of HIV patients is an important predictor of ART outcome (5-8), including the  
79 prediction of the CD4 cells change (9) and death (10-12). A negative change in BMI of patients  
80 was also found to be an independent predictor of dropout from HIV care (13).

81 The BMI of HIV patients is affected by gender(14) duration of treatment (10, 15, 16), Isoniazid  
82 Prophylaxis Therapy (IPT) and Cotrimoxazole prophylaxis(CPT) (17, 18) WHO stage (14) and  
83 CD4 count (15, 19).

1  
2  
3 84 This study focused on patients mainly because there is no much option for physicians to choose  
4  
5 85 from if therapy failed. BMI evolution is a very important and easily calculable tool that can  
6  
7  
8 86 predict treatment outcome, dropout from treatment, CD4 recovery, and death, but literatures  
9  
10 87 about its evolution across treatment time and factors affecting it are limited. Therefore this study  
11  
12 88 tried to fill this information gap by determining the BMI evolution over treatment time and  
13  
14 89 identifying the key factors affecting it. The information generated by this study will contribute to  
15  
16  
17 90 monitoring the response of patients for antiretroviral therapy.

## 19 91 **Method and materials**

### 22 92 **Study design and period**

24 93 An institution based retrospective follow up study was conducted among adults, age 24 and  
25  
26 94 above who are started on second-line ART from February 2008 to February 2016

### 29 95 **Study area and population**

31 96 The study was conducted in Amhara regional state which is one of the nine administrative  
32  
33 97 regions and two city councils of Ethiopia. The region constitutes majority of ART users in the  
34  
35  
36 98 country. The study population was adult HIV infected patients on second-line ART in all the  
37  
38 99 nine referral hospitals of the region. The first-line treatment consists of a combination of two  
39  
40  
41 100 nucleoside/nucleotide reverse transcriptase inhibitors (NRTI) with one non-nucleoside reverse  
42  
43 101 transcriptase inhibitor (NNRTI). Should failure of first-line treatment occur, a second-line  
44  
45 102 treatment is implemented, using two NRTIs not previously used in first-line treatment, as well as  
46  
47 103 one additional protease inhibitor (PI).

### 50 104 **Sample size and sampling procedure**



1  
2  
3 105 All HIV patients who initiated second-line therapy (n=1233) between February 2008 and 2016  
4  
5 106 were included. But only 1016 patients who had two or more measurements of weight were  
6  
7 107 included in the study.  
8  
9

### 10 11 **Data collection procedures**

12  
13 109 Data extraction checklist was prepared and the data were collected from HIV patient registration  
14  
15 110 cards. Data about the baseline weight and height of patients and other factors like socio-  
16  
17 111 demographic, clinical, and treatment related factors were also collected from each HIV patient  
18  
19 112 registration card. Adherence to ART was assessed by pill counts at visits and is recorded as  
20  
21 113 'GOOD' ( $\geq 95\%$  adherence) or FAIR (80%–95%), while POOR adherence is less than 80% (20).  
22  
23  
24  
25

### 26 114 **The data structure, compilation and analysis strategy**

27  
28  
29 115 The data was cleaned and entered in to EPI info version 7 and analyzed using STATA version  
30  
31 116 14.0. Body Mass Index (BMI) of HIV patients was computed by dividing the weight of patients  
32  
33 117 in kilograms (kg) that was recorded during each follow-up visit, to their baseline height in meter  
34  
35 118 squared. Exploratory data analysis for the weight of patients including individual profile plot,  
36  
37 119 mean profile plot, descriptive and summary statistics were done. To determine the factors  
38  
39 120 associated with BMI of patients bi-variable analysis for each independent variable was assessed  
40  
41 121 and those found to be significant (p-value $<0.25$ ) were selected for the multivariable analysis. The  
42  
43 122 need for random intercept and random slope was checked by likelihood ratio test. Since we  
44  
45 123 cannot ignore the repeated measurements that have between individual variation and within  
46  
47 124 individual variation(21), linear mixed effect model with random intercept and random slope was  
48  
49  
50  
51 125 fitted.  
52  
53

### 54 126 **Patient and Public Involvement**

1  
2  
3 127 Since we have used secondary data/chart review, patients or the public were not involved during  
4  
5 128 identifying the research question or design and conduct of the study.  
6  
7

## 8 129 **Results**

### 10 11 130 **Patient characteristics**

12  
13 131 We had a total of 1016 adult patients who were taking second-line ART. Among the total 538  
14  
15 132 (52.95%) were males. All participants were above or equal to the age of 24 with a median age of  
16  
17 133 33 years (IQR: 28; 39). A large proportion of these patients 370 (37.1%) were unemployed and  
18  
19 134 371 (36.9%) have attended secondary school.  
20  
21

22  
23 135 The median follow up time was 18 months (IQR: 5.2; 32.2). There were a maximum of 12 and a  
24  
25 136 minimum of 2 measurements of weight per patient. Almost all visits were not balanced in their  
26  
27 137 time of measurements. The median time between each weight measurement is reported as  
28  
29 138 median (inter-quartile range) as follows: 6.7(4.27, 10.03), 6.08(4.14, 9), 6.13(4.2, 8.9),  
30  
31 139 6.27(4.53, 8.9), 5.9(3.97, 7.79), 5.83(3.7, 8.13), 5.45 (3.37, 7.43), 4.86(2.97, 6.2), 5.19(3, 7.37),  
32  
33 140 5.97(4.23, 7.04), 5.55(2.83, 5.86) and 3(0.9, 4.84) months from first to twelfth weight  
34  
35 141 measurement respectively.  
36  
37

38  
39 142 At the initiation of second-line ART majority of participants, 393 (45.54%), were at WHO stage  
40  
41 143 I and 324 (37.54%) were at WHO stage III. A large proportion of participants 871 (86%) had  
42  
43 144 working functional status at baseline, the rest 114 (11.25%) and 28 (2.75%) were ambulatory  
44  
45 145 and bedridden respectively. The median CD4 count was 253 (IQR: 147; 399). Isoniazid  
46  
47 146 Prophylaxis Therapy and CPT were given for 247 (24.87%) and 256 (25.65%) of participants  
48  
49 147 respectively (**Table 1**).  
50  
51

52  
53 148

54  
55 149

150 Table-1: Baseline socio-demographic and baseline characteristics of adult HIV patients on ART  
 151 in Amhara region, 2008 to 2016

| Variables                 | Frequency | Percentage |
|---------------------------|-----------|------------|
| <b>Age</b>                |           |            |
| 25-34                     | 547       | 53.89      |
| 35-44                     | 333       | 32.81      |
| 45-54                     | 104       | 10.25      |
| 55-64                     | 26        | 2.56       |
| ≥ 65                      | 6         | 0.59       |
| <b>Sex</b>                |           |            |
| Female                    | 478       | 47.05      |
| Male                      | 538       | 52.95      |
| <b>Educational status</b> |           |            |
| No education              | 315       | 31.34      |
| Primary education         | 201       | 20.00      |
| Secondary education       | 371       | 36.92      |
| Tertiary education        | 118       | 11.74      |
| Missing                   | 11        | 0.01       |
| <b>Occupation</b>         |           |            |
| Unemployed                | 370       | 36.42      |
| Governmental              | 286       | 28.15      |
| Non-Governmental          | 21        | 2.06       |
| Private                   | 66        | 6.50       |
| Daily laborers            | 254       | 25.00      |
| Missing                   | 19        | 1.87       |
| <b>WHO stages</b>         |           |            |
| Stage I                   | 393       | 45.54      |
| Stage II                  | 66        | 7.65       |
| Stage III                 | 324       | 37.54      |
| Stage IV                  | 80        | 9.27       |
| <b>Functional status</b>  |           |            |
| Working                   | 871       | 86         |
| Ambulatory                | 114       | 11.25      |
| Bedridden                 | 28        | 2.75       |
| <b>CPT given</b>          |           |            |
| No                        | 742       | 74.35      |
| Yes                       | 256       | 25.65      |
| <b>INH given</b>          |           |            |
| No                        | 746       | 75.13      |
| Yes                       | 247       | 24.87      |

152 CPT= Cotrimoxazole Prophylaxis Therapy

153 INH= Isoniazid

154

## 155 **Exploratory data analysis**

156 At baseline a total of 391(38.5%) had BMI of less than 18.5kg/m<sup>2</sup> whereas 549(54%), 64(6.3%)  
157 and 12(1.2%) had BMI 18.5-24.9 kg/m<sup>2</sup>, 25-29.9 kg/m<sup>2</sup> and  $\geq 30$  kg/m<sup>2</sup> respectively.

## 158 **Individual Profile**

159 The average BMI of patients at baseline was 19.03Kg/m<sup>2</sup> (SD=3.6 Kg/m<sup>2</sup>). The minimum and  
160 maximum BMI was 8.33 Kg/m<sup>2</sup> and 33.59 Kg/m<sup>2</sup> respectively. Before proceeding to the formal  
161 statistical analysis we have described the data by exploring how individuals change in BMI over  
162 time. To make the individual profile plot more informative and understandable, we have  
163 prepared it for the first 100 individuals (**Figure 1**).

164 As we can see from this plot, the BMI status of patients has high variability within an individual  
165 over time and among individuals at baseline and also through time. Therefore to fit the data  
166 which has variability in the intercept and slope of trajectories very well, we have used a mixed  
167 model.

## 168 **Exploring the mean profile**

169 As stated above all measurements in the data have no similar time of measurements, therefore,  
170 we have used smoothing to determine BMI evolution over time (**Figure-2**).

171 As one can easily understand from the mean profile plot the BMI of these patients showed a  
172 linear increment over the treatment time.

## 173 **Modeling the BMI**

### 174 **Correlation structure checking and model comparison**

175 Comparing with AIC, the correlation structure with the lowest AIC was chosen, in this case the  
176 unstructured correlation structure (**Table-2**).

177

178 Table 2: Correlation structure checking and model comparison

|     | Unstructured | Identity | Exchangeable |
|-----|--------------|----------|--------------|
| AIC | 14337.93     | 17775.34 | 17666.17     |
| BIC | 14531.08     | 17956.02 | 17853.09     |

179  
180 The need for random slope and intercept was checked by the likelihood ratio test of model  
181 without a random intercept, with only random intercept and a model with both random intercept  
182 and slope (**Table-3**).

183 Table 3: Random Effects Models comparison

| Random effects         | LR X <sup>2</sup> | P value |
|------------------------|-------------------|---------|
| Model-1 intercept      | 5625.28           | 0.0000  |
| Model2 intercept, time | 297.13            | 0.0000  |

184 So as we can see from the table-3 the inclusion of random intercept and random slope is  
185 reasonable so in the final model, we have used both random intercept and random slope.

### 186 **Factors affecting BMI evolution over time**

187 Based on the multi-variable output: time since the start of second-line ART, IPT, CPT,  
188 Functional status, WHO stage of the disease; and time interaction of categorical variables like  
189 educational status, functional status and WHO stages were found to be significant predictors of  
190 the BMI evolution of HIV patients on second-line ART.

191 Keeping all the other variables constant, for a one month increment in the treatment duration the  
192 BMI of a patient increases by 0.013 kg/m<sup>2</sup>. But specifically individuals who have tertiary level of  
193 education, ambulatory functional status and who are at WHO stage III have additional 0.02  
194 kg/m<sup>2</sup>, 0.03 kg/m<sup>2</sup> and 0.01 kg/m<sup>2</sup> increment respectively in their BMI for a one month  
195 increment in the duration of treatment.

1  
2  
3 196 Taking IPT and CPT increases BMI by 0.87 kg/m<sup>2</sup> and 0.63 kg/m<sup>2</sup> respectively as compared to  
4  
5 197 their counterparts. Nongovernmental organization employment was associated with a 2.02 kg/m<sup>2</sup>  
6  
7 198 increment when compared to government employment. Patients who are ambulatory and  
8  
9 199 bedridden in their functional status have a 1.16 kg/m<sup>2</sup> and 1.83 kg/m<sup>2</sup> decrement in their BMI as  
10  
11 200 compared to those who have working functional status. Patients who are at WHO stage III and  
12  
13 201 WHO stage IV have decreased BMI by 0.42 kg/m<sup>2</sup> and 0.62 kg/m<sup>2</sup> when compared with those  
14  
15 202 who are at WHO stage I. For a unit cell/mm<sup>3</sup> increase in the CD4 count of patients BMI was  
16  
17 203 found to increase by a factor of 0.001 kg/m<sup>2</sup> (**Table-4**).  
18  
19  
20  
21  
22  
23  
24  
25  
26  
27  
28  
29  
30  
31  
32  
33  
34  
35  
36  
37  
38  
39  
40  
41  
42  
43  
44  
45  
46  
47  
48  
49  
50  
51  
52  
53  
54  
55  
56  
57  
58  
59  
60

204 **Table 4: Parameter estimates for full linear mixed effect model**

| Characteristics          | Co-efficient | Confidence interval |        | P value |
|--------------------------|--------------|---------------------|--------|---------|
|                          |              | Lower               | Upper  |         |
| Intercept                | 19.03        | 18.11               | 19.95  | 0.000   |
| Sex                      |              |                     |        |         |
| Female                   | 0.00         |                     |        |         |
| Male                     | -0.01        | -0.51               | 0.48   | 0.956   |
| Adherence                |              |                     |        |         |
| Poor                     | 0.00         |                     |        |         |
| Fair                     | 0.43         | -0.24               | 1.10   | 0.207   |
| Good                     | 0.48         | -0.06               | 1.02   | 0.080   |
| INH prophylaxis given    |              |                     |        |         |
| No                       | 0.00         |                     |        |         |
| Yes                      | 0.87         | 0.32                | 1.42   | 0.002   |
| CPT prophylaxis given    |              |                     |        |         |
| No                       | 0.00         |                     |        |         |
| Yes                      | 0.63         | 0.08                | 1.19   | 0.025   |
| Educational status       |              |                     |        |         |
| Illiterate               | 0.00         |                     |        |         |
| Primary                  | -0.03        | -0.72               | 0.66   | 0.924   |
| Secondary                | 0.47         | -0.21               | 1.14   | 0.176   |
| Tertiary                 | 0.94         | -0.01               | 1.89   | 0.051   |
| Functional status        |              |                     |        |         |
| Working                  | 0.00         |                     |        |         |
| Ambulatory               | -1.16        | -1.95               | -1.31  | 0.000   |
| Bedridden                | -1.83        | -2.47               | -1.21  | 0.000   |
| WHO stage                |              |                     |        |         |
| Stage I                  | 0.00         |                     |        |         |
| Stage II                 | -0.06        | -0.45               | 0.33   | 0.760   |
| Stage III                | -0.42        | -0.65               | -0.20  | 0.000   |
| Stage IV                 | -0.62        | -1.02               | -0.22  | 0.002   |
| CD4 count                | 0.001        | 0.0008              | 0.0015 | 0.000   |
| Time on treatment        | 0.013        | 0.004               | 0.022  | 0.005   |
| Education status x time  |              |                     |        |         |
| Illiterate x time        | 0.00         |                     |        |         |
| Primary x time           | 0.002        | -0.01               | 0.015  | 0.801   |
| Secondary x time         | 0.01         | -0.003              | 0.019  | 0.162   |
| Tertiary x time          | 0.02         | 0.01                | 0.04   | 0.009   |
| Functional status x time |              |                     |        |         |
| Working x time           | 0.00         |                     |        |         |
| Ambulatory x time        | 0.03         | 0.01                | 0.05   | 0.000   |
| Bedridden x time         | -0.01        | -0.05               | 0.02   | 0.49    |
| WHO stage x time         |              |                     |        |         |
| Stage I x time           | 0.00         |                     |        |         |
| Stage II x time          | 0.004        | -0.008              | 0.166  | 0.522   |
| Stage III x time         | 0.01         | 0.007               | 0.020  | 0.000   |
| Stage IV x time          | -0.0003      | -0.016              | 0.016  | 0.969   |

## 205 **DISCUSSION**

206 This study has found a linear increment in BMI of patients over the treatment time. There were  
207 BMI differences between subjects at baseline and in their progress over time.

208 Factors found to have a significant effect on the evolution of BMI over treatment time at a  
209 multivariable linear mixed effect model were, second-line treatment duration, IPT, CPT,  
210 employment status, functional status of the patient, WHO stage, and CD4 count. Time  
211 interaction of educational status, functional status, and WHO stage were also significant  
212 predictors of BMI evolution.

213 For a one month increase in treatment duration the BMI of patients increases by 0.04 kg/m<sup>2</sup>, this  
214 finding is in line with studies in South Africa (22), India (10) and United States(23). The possible  
215 reasons for weight gain could be due to normal reversion of the weight loss associated with HIV  
216 or due to drug related metabolic changes which include hyperlipidemia, insulin resistance and  
217 diabetes(24).

218 Patients who took IPT and CPT have increased BMI when compared to their respective  
219 counterparts. This finding is supported by other studies like a study conducted in Abidjan (17)  
220 and multicenter controlled clinical trial in Africa (18). The main reason for this association could  
221 be the reduction of potentially disabling and wasting diseases like tuberculosis and other  
222 opportunistic infections by these prophylactic drugs(25, 26). A highly increased appetite by the  
223 prophylaxis could also be possible explanation(27).

224 Being ambulatory and bedridden decreases BMI when compared to those who are working.  
225 Since these individuals are not working they may not access a nutritious and balanced diet which  
226 affects their BMI. Another reason could be additionally decreased immunity caused by physical  
227 inactivity which makes them more susceptible to minor infections leading to a higher calorie



1  
2  
3 228 loss(28). These groups of people are also at higher risk of diarrheal disease for they cannot take  
4  
5 229 care of themselves which in turn causes weight loss(29).  
6

7  
8 230 When compared with patients who are at WHO stage I, those who are at WHO stage III and  
9  
10 231 WHO stage IV have decreased BMI. This finding is in line with a multicenter study in resource  
11  
12 232 limited settings which shows individuals who had high clinical status ( WHO stage III and WHO  
13  
14 233 stage IV) had poorer weight gain when compared to weight change in patients at lower WHO  
15  
16 234 stage(14). The possible reason can be unexplained chronic diarrhea and HIV enteropathy in these  
17  
18 235 patients and the associated malabsorption (4) or it could be due to pyrexia of unknown origin in  
19  
20 236 the late stage of the disease which results an increased calorie loss and wasting(30).  
21  
22

23  
24 237 The BMI of patients was also found to increase with the increment in their CD4 count. This  
25  
26 238 positive association is supported by evidence from a study conducted in Boston (15) and  
27  
28 239 Tanzania (19). This increment can be explained by the association of increment of CD4 count  
29  
30 240 with good clinical changes like viral suppression, improved immunity, and appetite leading to  
31  
32 241 increment in the BMI of patients (13).  
33  
34

35 242 Being a retrospective study, this study shares the limitations of secondary data collection, as a  
36  
37 243 result, we were unable to find some predictors like viral load, alcohol consumption, smoking,  
38  
39 244 marital status, and nutritional history. The data may also have errors in documenting weight  
40  
41 245 among some measurements.  
42  
43

## 44 45 246 **CONCLUSION**

46  
47 247 In this study, we have found a linear increment in the BMI of HIV patients on second line ART.  
48  
49 248 There was a significant variation of BMI of patients at baseline and through ART treatment time.  
50  
51 249 Duration of treatment, IPT, CPT, functional status, WHO stage of the disease, CD4 count; and  
52  
53 250 time interaction of categorical variables like educational status, functional status and WHO  
54  
55  
56  
57

1  
2  
3 251 stages were found to be significant predictors. The positive change in the BMI of patients shows  
4  
5 252 an encouraging trend for we know this has a positive impact on the CD4 recovery, decrease lost  
6  
7  
8 253 to follow up and death. Clinicians also must consider the identified risk factors when they  
9  
10 254 provide service for these patients.

## 11 255 **ABBREVIATIONS**

12  
13  
14 256 AIC, Akaike's Information Criterion; AIDS, Acquired Immunodeficiency Virus; ART,  
15  
16 257 Anti-Retroviral Therapy; BIC, Bayesian information criterion; BMI,  
17  
18  
19 258 Body Mass Index; CI, Confidence Interval; CPT, Co-trimoxazole preventive therapy; HIV,  
20  
21 259 Human Immuno Deficiency Virus; IPT, Isoniazid Prophylaxis Therapy; Kg,  
22  
23  
24 260 Kilogram; NGO, Non Governmental Organizations; WHO,  
25  
26 261 World Health Organization.

## 27 28 29 30 **Declarations**

### 31 32 **Ethical consideration**

33  
34  
35 264 Ethical clearance was obtained from the Institutional Review Board of Institute of Public Health,  
36  
37 265 University of Gondar. Names and unique ART numbers of patients were not collected to keep  
38  
39 266 the privacy of patients during the data collection.

### 40 41 **Availability of data and materials**

42  
43  
44 268 The data upon which the result based could be accessed by a reasonable request made to the  
45  
46 269 corresponding author.

### 47 48 **Funding**

49  
50  
51 271 Not applicable

### 52 53 **Consent for publication**

1  
2  
3 273 Not applicable  
4

5  
6 274 **Competing interest**  
7

8 275 Authors declare that they have no conflict of interest  
9

10  
11 276 **Authors' contribution**

12  
13 277 AGB, LDG, EGZ, TAA, ATT have actively participated during Conception and design,  
14  
15 278 acquisition of data, analysis, and interpretation of data. All authors have read and approved the  
16  
17 279 final version of the manuscript.  
18

19  
20 280 **Acknowledgments**

21  
22 281 First of all, we would like to thank the Almighty God. We would like say thank you to  
23  
24 282 University of Gondar, Amhara regional health office and hospital administrative bodies,  
25  
26 283 clinicians, data clerks, and card room workers for their cooperation and permission to conduct  
27  
28 284 the study.  
29  
30

31  
32 285 **Authors' information**  
33

34 286 Adhanom Gebreegziabher has BSc degree in Public health as a background and second degree in  
35  
36 287 Epidemiology and Biostatistics; now teaching Epidemiology, Research methodology and  
37  
38 288 communicable disease control courses in the University of Gondar, Ethiopia  
39  
40  
41

42 289  
43  
44

45 290  
46  
47

48 291  
49

50 292  
51  
52

53 293  
54  
55

56 294  
57  
58

295

296 **REFERENCES**

- 297 1. World Health Organization. HIV/AIDS key facts available at [http://www.who.int/news-room/fact-](http://www.who.int/news-room/fact-sheets/detail/hiv-aids)  
298 [sheets/detail/hiv-aids](http://www.who.int/news-room/fact-sheets/detail/hiv-aids). 2018.
- 299 2. Central statistical agency. Ethiopia Demographic and Health Survey HIV Prevalence Report  
300 available at <https://www.dhsprogram.com/pubs/pdf/FR328/FR328HIV.pdf>. 2016.
- 301 3. Mahy M, Stover J, Stanecki K, Stoneburner R, Tassie J-M. Estimating the impact of antiretroviral  
302 therapy: regional and global estimates of life-years gained among adults. Sexually transmitted  
303 infections. 2010;86(Suppl 2):ii67-ii71.
- 304 4. World Health Organization. Interim WHO Clinical Staging of HIV/AIDS AND HIV/AIDS Case  
305 Definitions for Surveillance, African Region. available at  
306 <http://www.who.int/hiv/pub/guidelines/clinicalstagingpdf>. 2005.
- 307 5. Tsegaye AT, Wubshet M, Awoke T, Addis Alene K. Predictors of treatment failure on  
308 antiretroviral therapy among adults in northwest Ethiopia: a multicentre retrospective follow-up study.  
309 BMJ Open. 2016;6(12):e012537. Epub 2016/12/10.
- 310 6. Seyoum A, Ndlovu P, Zewotir T. Quasi-Poisson versus negative binomial regression models in  
311 identifying factors affecting initial CD4 cell count change due to antiretroviral therapy administered to  
312 HIV-positive adults in North-West Ethiopia (Amhara region). AIDS Res Ther. 2016;13:36. Epub  
313 2016/11/16.
- 314 7. Patel D, Desai M, Shah AN, Dikshit RK. Early outcome of second-line antiretroviral therapy in  
315 treatment-experienced human immunodeficiency virus positive patients. Perspect Clin Res.  
316 2013;4(4):215-20. Epub 2013/12/07.
- 317 8. Dalhatu I, Onotu D, Odafe S, Abiri O, Debem H, Agolory S, et al. Outcomes of Nigeria's HIV/AIDS  
318 Treatment Program for Patients Initiated on Antiretroviral Treatment between 2004-2012. PLoS One.  
319 2016;11(11):e0165528. Epub 2016/11/10.
- 320 9. Koethe JR, Jenkins CA, Lau B, Shepherd BE, Silverberg MJ, Brown TT, et al. Body mass index and  
321 early CD4 T-cell recovery among adults initiating antiretroviral therapy in North America, 1998-2010. HIV  
322 Med. 2015;16(9):572-7. Epub 2015/05/12.
- 323 10. Chakravarty J, Sundar S, Chourasia A, Singh PN, Kurle S, Tripathy SP, et al. Outcome of patients  
324 on second-line antiretroviral therapy under programmatic condition in India. BMC Infect Dis.  
325 2015;15:517. Epub 2015/11/18.
- 326 11. Thao VP, Quang VM, Wolbers M, Anh ND, Shikuma C, Farrar J, et al. HIV Therapy Outcomes and  
327 Determinants of Mortality at the Largest HIV Referral Center in Southern Vietnam. Medicine (Baltimore).  
328 2015;94(43):e1715. Epub 2015/10/30.
- 329 12. Swain PK, Grover G. Determination of Predictors Associated With HIV/AIDS Patients Using  
330 Accelerated Failure Time Model for Interval Censored Survival Data. 2016.
- 331 13. Asiimwe SB, Kanyesigye M, Bwana B, Okello S, Muyindike W. Predictors of dropout from care  
332 among HIV-infected patients initiating antiretroviral therapy at a public sector HIV treatment clinic in  
333 sub-Saharan Africa. BMC Infect Dis. 2016;16:43. Epub 2016/02/03.
- 334 14. Huisin 't Veld D, Balestre E, Buyze J, Menten J, Jaquet A, Cooper DA, et al. Determinants of  
335 Weight Evolution Among HIV-Positive Patients Initiating Antiretroviral Treatment in Low-Resource  
336 Settings. J Acquir Immune Defic Syndr. 2015;70(2):146-54. Epub 2015/09/17.
- 337 15. Mwamburi DM, Wilson IB, Jacobson DL, Spiegelman D, Gorbach SL, Knox TA, et al.  
338 Understanding the Role of HIV Load in Determining Weight Change in the Era of Highly Active  
339 Antiretroviral Therapy. Clinical Infectious Diseases. 2005;40(1):167-73.

- 1  
2  
3 340 16. Tang AM, Sheehan HB, Jordan MR, Duong DV, Terrin N, Dong K, et al. Predictors of Weight  
4 341 Change in Male HIV-Positive Injection Drug Users Initiating Antiretroviral Therapy in Hanoi, Vietnam.  
5 342 AIDS Res Treat. 2011;2011:890308. Epub 2011/07/22.
- 6 343 17. Guehi C, Badje A, Gabillard D, Ouattara E, Koule SO, Moh R, et al. High prevalence of being  
7 344 Overweight and Obese HIV-infected persons, before and after 24 months on early ART in the ANRS  
8 345 12136 Temprano Trial. AIDS Res Ther. 2016;13:12. Epub 2016/03/01.
- 9 346 18. Haller L, Sossouhounto R, Coulibaly IM, Dosso M, Kone M, Adom H, et al. Isoniazid plus  
10 347 sulphadoxine-pyrimethamine can reduce morbidity of HIV-positive patients treated for tuberculosis in  
11 348 Africa: a controlled clinical trial. Chemotherapy. 1999;45(6):452-65. Epub 1999/11/24.
- 12 349 19. Li N, Spiegelman D, Drain P, Mwiru RS, Mugusi F, Chalamilla G, et al. Predictors of weight loss  
13 350 after HAART initiation among HIV-infected adults in Tanzania. AIDS. 2012;26(5):577-85. Epub  
14 351 2011/12/14.
- 15 352 20. Ministry of Health. Federal Democratic Republic of Ethiopia. National guidelines for  
16 353 comprehensive HIV prevention, care and treatment, . 2014.
- 17 354 21. Peng H, Lu Y. Model selection in linear mixed effect models. Journal of Multivariate Analysis.  
18 355 2012;109:109-29.
- 19 356 22. Huis In 't Veld D, Pengpid S, Colebunders R, Peltzer K. Body Mass Index and Waist Circumference  
20 357 in Patients with HIV in South Africa and Associated Socio-demographic, Health Related and Psychosocial  
21 358 Factors. AIDS Behav. 2017. Epub 2017/03/01.
- 22 359 23. Crum-Cianflone N, Roediger MP, Eberly L, Headd M, Marconi V, Ganesan A, et al. Increasing  
23 360 rates of obesity among HIV-infected persons during the HIV epidemic. Plos one. 2010;5(4):e10106.
- 24 361 24. Montessori V, Press N, Harris M, Akagi L, Montaner JSG. Adverse effects of antiretroviral therapy  
25 362 for HIV infection. CMAJ : Canadian Medical Association Journal. 2004;170(2):229-38.
- 26 363 25. Dowdy DW, Golub JE, Saraceni V, Moulton LH, Cavalcante SC, Cohn S, et al. Impact of isoniazid  
27 364 preventive therapy for HIV-infected adults in Rio de Janeiro, Brazil: an epidemiological model. Journal of  
28 365 acquired immune deficiency syndromes (1999). 2014;66(5):552.
- 29 366 26. Mermin J, Lule J, Ekwaru JP, Malamba S, Downing R, Ransom R, et al. Effect of co-trimoxazole  
30 367 prophylaxis on morbidity, mortality, CD4-cell count, and viral load in HIV infection in rural Uganda. The  
31 368 Lancet. 2004;364(9443):1428-34.
- 32 369 27. Mudie I, Horne N, Crofton J. Isoniazid and weight gain. British Medical Journal.  
33 370 1954;1(4874):1304.
- 34 371 28. Nieman DC. Exercise, infection, and immunity. International journal of sports medicine.  
35 372 1994;15(3):S131.
- 36 373 29. Katabira ET. Epidemiology and management of diarrheal disease in HIV infected patients.  
37 374 International journal of infectious diseases. 1999;3(3):164-7.
- 38 375 30. Hot A, Schmulewitz L, Viard J-P, Lortholary O. Fever of unknown origin in HIV/AIDS patients.  
39 376 Infectious disease clinics of North America. 2007;21(4):1013-32.

377

378

379

380

381

1  
2  
3  
4 382 **Figures Legend**

5  
6  
7 383 **Figure 1: Individual profile plot of BMI overtime for the first 100 individuals at second-**  
8  
9 384 **line ART in Amhara region, 2008-2016**

10  
11  
12 385 **Figure 2: Time plot of BMI versus treatment time in months with lowess smoothed curve**  
13  
14 386 **superimposed for HIV patients on second-line ART in Amhara region 2008-2016**

15  
16  
17  
18 387

19  
20  
21  
22 388

23  
24  
25  
26 389

27  
28  
29  
30 390

31  
32  
33  
34 391

35  
36  
37  
38 392

39  
40  
41  
42 393

43  
44  
45  
46 394

47  
48  
49  
50 395

51  
52  
53 396

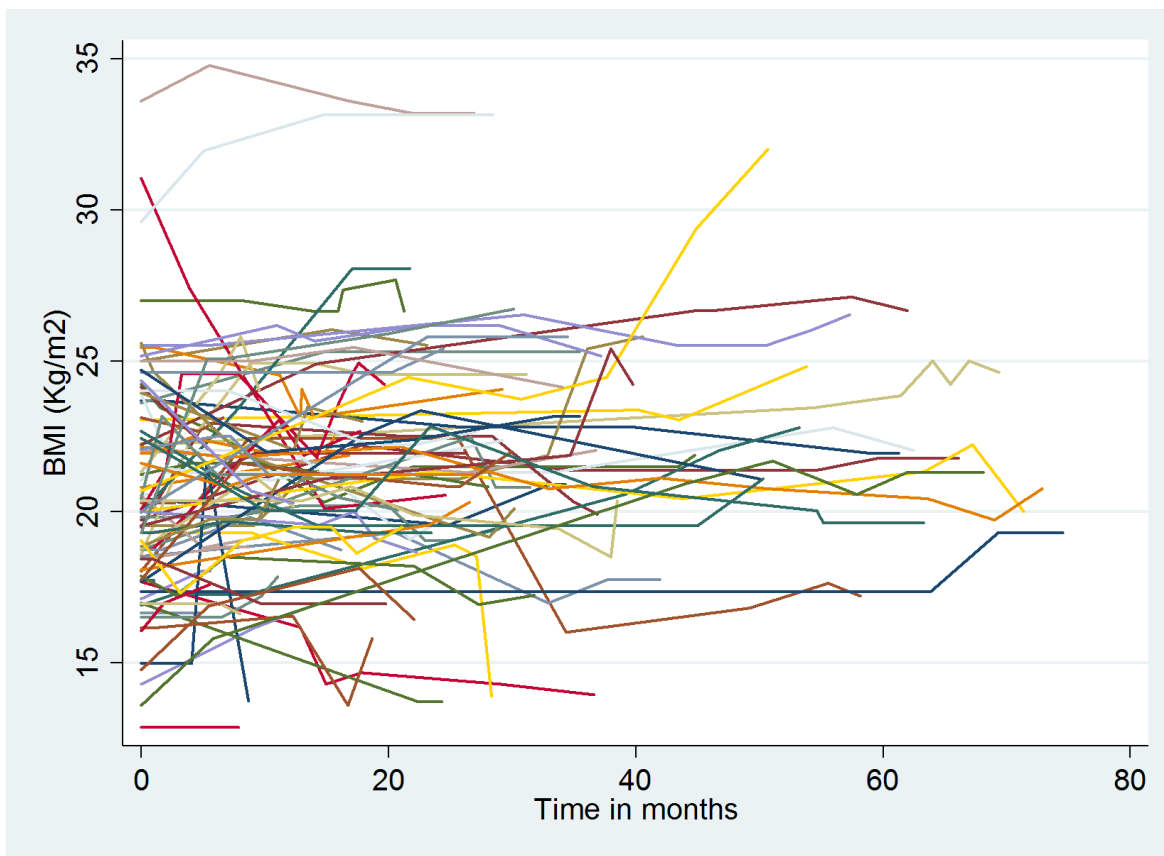

1  
2  
3  
4  
5  
6  
7  
8  
9  
10  
11  
12  
13  
14  
15  
16  
17  
18  
19  
20  
21  
22  
23  
24  
25  
26  
27  
28  
29  
30  
31  
32  
33  
34  
35  
36  
37  
38  
39  
40  
41  
42  
43  
44  
45  
46  
47  
48  
49  
50  
51  
52  
53  
54  
55  
56  
57  
58  
59  
60

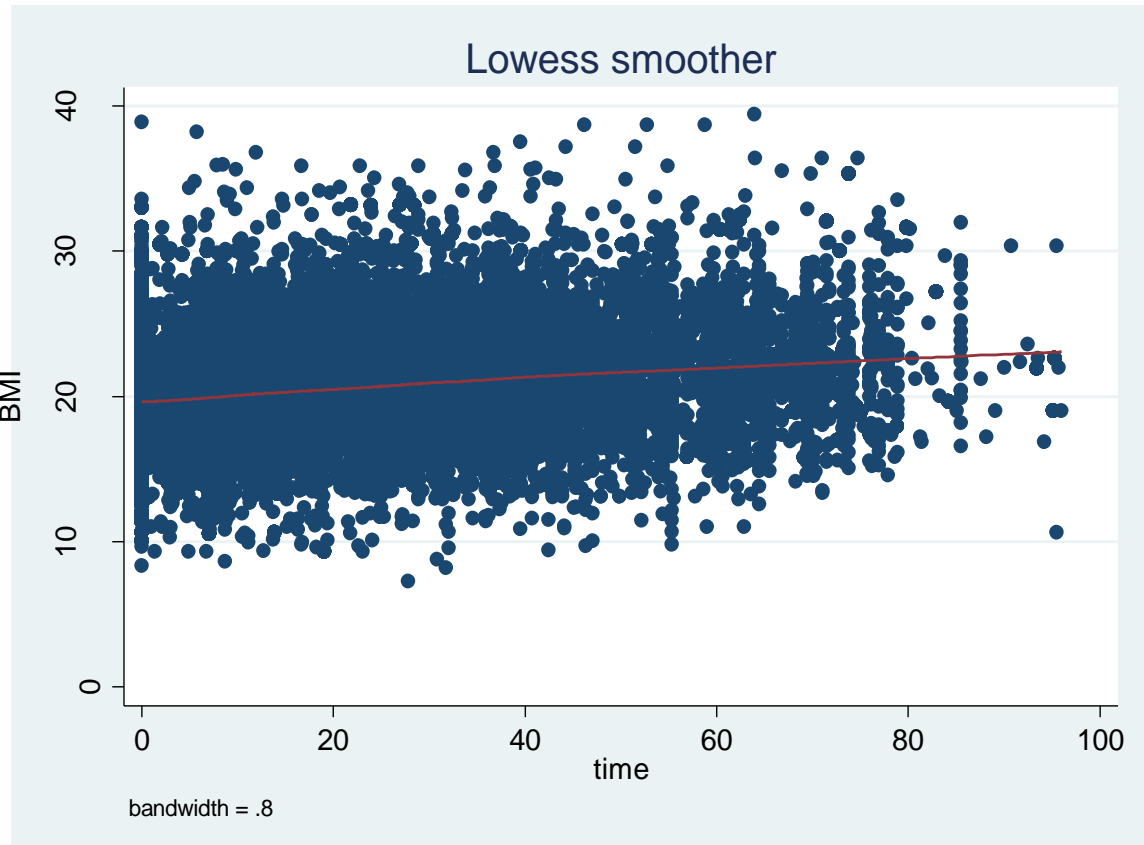



STROBE Statement—Checklist of items that should be included in reports of *cohort studies*

|                              | Item No | Recommendation                                                                                                                                                                                                                                                                                                         | Page No |
|------------------------------|---------|------------------------------------------------------------------------------------------------------------------------------------------------------------------------------------------------------------------------------------------------------------------------------------------------------------------------|---------|
| <b>Title and abstract</b>    | 1       | (a) Indicate the study's design with a commonly used term in the title or the abstract<br>(b) Provide in the abstract an informative and balanced summary of what was done and what was found                                                                                                                          | 1-2     |
| <b>Introduction</b>          |         |                                                                                                                                                                                                                                                                                                                        |         |
| Background/rationale         | 2       | Explain the scientific background and rationale for the investigation being reported                                                                                                                                                                                                                                   | 4       |
| Objectives                   | 3       | State specific objectives, including any prespecified hypotheses                                                                                                                                                                                                                                                       | 4-5     |
| <b>Methods</b>               |         |                                                                                                                                                                                                                                                                                                                        |         |
| Study design                 | 4       | Present key elements of study design early in the paper                                                                                                                                                                                                                                                                | 5       |
| Setting                      | 5       | Describe the setting, locations, and relevant dates, including periods of recruitment, exposure, follow-up, and data collection                                                                                                                                                                                        | 5       |
| Participants                 | 6       | (a) Give the eligibility criteria, and the sources and methods of selection of participants. Describe methods of follow-up<br>(b) For matched studies, give matching criteria and number of exposed and unexposed                                                                                                      | 5       |
| Variables                    | 7       | Clearly define all outcomes, exposures, predictors, potential confounders, and effect modifiers. Give diagnostic criteria, if applicable                                                                                                                                                                               | 6       |
| Data sources/<br>measurement | 8*      | For each variable of interest, give sources of data and details of methods of assessment (measurement). Describe comparability of assessment methods if there is more than one group                                                                                                                                   | 5-6     |
| Bias                         | 9       | Describe any efforts to address potential sources of bias                                                                                                                                                                                                                                                              | 5       |
| Study size                   | 10      | Explain how the study size was arrived at                                                                                                                                                                                                                                                                              |         |
| Quantitative variables       | 11      | Explain how quantitative variables were handled in the analyses. If applicable, describe which groupings were chosen and why                                                                                                                                                                                           | 5-6     |
| Statistical methods          | 12      | (a) Describe all statistical methods, including those used to control for confounding<br>(b) Describe any methods used to examine subgroups and interactions<br>(c) Explain how missing data were addressed<br>(d) If applicable, explain how loss to follow-up was addressed<br>(e) Describe any sensitivity analyses | 6       |
| <b>Results</b>               |         |                                                                                                                                                                                                                                                                                                                        |         |
| Participants                 | 13*     | (a) Report numbers of individuals at each stage of study—eg numbers potentially eligible, examined for eligibility, confirmed eligible, included in the study, completing follow-up, and analysed<br>(b) Give reasons for non-participation at each stage<br>(c) Consider use of a flow diagram                        | 7       |
| Descriptive data             | 14*     | (a) Give characteristics of study participants (eg demographic, clinical, social) and information on exposures and potential confounders<br>(b) Indicate number of participants with missing data for each variable of interest<br>(c) Summarise follow-up time (eg, average and total amount)                         | 7       |
| Outcome data                 | 15*     | Report numbers of outcome events or summary measures over time                                                                                                                                                                                                                                                         | 7-9     |

|    |                          |    |                                                                                                                                                                                                              |         |
|----|--------------------------|----|--------------------------------------------------------------------------------------------------------------------------------------------------------------------------------------------------------------|---------|
| 1  | Main results             | 16 | (a) Give unadjusted estimates and, if applicable, confounder-adjusted estimates and their precision (eg, 95% confidence interval). Make clear which confounders were adjusted for and why they were included | 7-9     |
| 2  |                          |    | (b) Report category boundaries when continuous variables were categorized                                                                                                                                    |         |
| 3  |                          |    | (c) If relevant, consider translating estimates of relative risk into absolute risk for a meaningful time period                                                                                             |         |
| 4  |                          |    |                                                                                                                                                                                                              |         |
| 5  |                          |    |                                                                                                                                                                                                              |         |
| 6  |                          |    |                                                                                                                                                                                                              |         |
| 7  |                          |    |                                                                                                                                                                                                              |         |
| 8  |                          |    |                                                                                                                                                                                                              |         |
| 9  | Other analyses           | 17 | Report other analyses done—eg analyses of subgroups and interactions, and sensitivity analyses                                                                                                               | --      |
| 10 |                          |    |                                                                                                                                                                                                              |         |
| 11 | <b>Discussion</b>        |    |                                                                                                                                                                                                              |         |
| 12 |                          |    |                                                                                                                                                                                                              |         |
| 13 | Key results              | 18 | Summarise key results with reference to study objectives                                                                                                                                                     | 9-10    |
| 14 | Limitations              | 19 | Discuss limitations of the study, taking into account sources of potential bias or imprecision. Discuss both direction and magnitude of any potential bias                                                   | 11      |
| 15 |                          |    |                                                                                                                                                                                                              |         |
| 16 | Interpretation           | 20 | Give a cautious overall interpretation of results considering objectives, limitations, multiplicity of analyses, results from similar studies, and other relevant evidence                                   | 10 - 11 |
| 17 |                          |    |                                                                                                                                                                                                              |         |
| 18 |                          |    |                                                                                                                                                                                                              |         |
| 19 | Generalisability         | 21 | Discuss the generalisability (external validity) of the study results                                                                                                                                        | 11      |
| 20 |                          |    |                                                                                                                                                                                                              |         |
| 21 | <b>Other information</b> |    |                                                                                                                                                                                                              |         |
| 22 | Funding                  | 22 | Give the source of funding and the role of the funders for the present study and, if applicable, for the original study on which the present article is based                                                | 12      |
| 23 |                          |    |                                                                                                                                                                                                              |         |
| 24 |                          |    |                                                                                                                                                                                                              |         |

\*Give information separately for exposed and unexposed groups.

**Note:** An Explanation and Elaboration article discusses each checklist item and gives methodological background and published examples of transparent reporting. The STROBE checklist is best used in conjunction with this article (freely available on the Web sites of PLoS Medicine at <http://www.plosmedicine.org/>, Annals of Internal Medicine at <http://www.annals.org/>, and Epidemiology at <http://www.epidem.com/>). Information on the STROBE Initiative is available at <http://www.strobe-statement.org>.
